# Supplementary material for: Doxycycline Alters the Porcine Renal Proteome and Degradome during Hypothermic Machine Perfusion
Source: MDPI journal article supplement (doi:10.3390/cimb44020039), 2022-01-23
Supplement: s1 [file s1]

**Table S1.** Identified proteins in the urine during NMP

| Accession number | Difference (DOXY vs Control) | -Log10 (P-value)   |
|------------------|------------------------------|--------------------|
| P14632           | -0,718323538                 | <b>2,443344056</b> |
| Q06AA3           | -0,853458415                 | <b>1,317865238</b> |
| P51781           | -0,880076761                 | <b>1,467952651</b> |
| P61288           | -0,432462151                 | <b>1,318433906</b> |
| Q9GK37           | -0,753159046                 | <b>1,511834839</b> |
| Q5G6V9           | -0,583474712                 | <b>1,980557928</b> |
| P67937           | -0,397668592                 | <b>1,462279948</b> |
| Q5XLD3           | -0,713990797                 | <b>1,362004962</b> |
| A1E295           | -0,921003576                 | <b>1,431082964</b> |
| A6M931           | -0,595868215                 | <b>1,667335577</b> |
| P31950           | -0,62466285                  | <b>2,180157401</b> |
| P12675           | 0,465654921                  | <b>1,520396018</b> |
| Q69DK8           | 0,735955609                  | <b>1,562074673</b> |
| O11780           | 0,771671426                  | <b>1,357322297</b> |
| Q29052           | 0,094118907                  | 0,26559026         |
| Q29268           | 0,082456301                  | 0,138208932        |
| Q29068           | -0,529800827                 | 0,336133319        |
| Q29261           | 0,121866841                  | 0,103343556        |
| Q29092           | -0,09303285                  | 0,093728667        |
| Q29073           | -0,329194749                 | 0,408525668        |
| Q29236           | 0,638073691                  | 1,161634829        |
| Q29228           | -0,035598575                 | 0,041960405        |
| Q29214           | 0,43823039                   | 0,971511384        |
| Q29099           | 0,18938702                   | 0,39588393         |
| Q29243           | -0,066607557                 | 0,129614095        |
| Q29221           | 0,238803367                  | 0,472385818        |
| Q29371           | -0,195320761                 | 0,506843136        |
| Q29318           | -0,181405615                 | 0,139461341        |
| Q2HYU2           | -0,084957314                 | 0,160768472        |
| Q2EN76           | 0,326246659                  | 0,335782153        |
| Q2EN75           | -0,084926831                 | 0,138502435        |
| Q29594           | -0,005294279                 | 0,009051013        |
| Q29561           | -0,061972116                 | 0,065187845        |
| Q29550           | -0,614821512                 | 0,866379692        |
| Q29315           | 0,307664646                  | 0,730534804        |
| Q29549           | -0,166064814                 | 0,544962967        |
| Q29545           | 0,027828042                  | 0,08563466         |
| Q29387           | -0,065920829                 | 0,10514791         |
| Q29384           | 0,222791269                  | 0,304389744        |
| Q29375           | 0,198641051                  | 0,381582371        |
| Q29048           | -0,288357765                 | 0,301359592        |
| Q29361           | -0,240697265                 | 0,487138905        |
| Q29548           | -0,192797844                 | 0,419545411        |
| Q29043           | -0,9552374                   | 0,702432462        |
| Q28944           | -0,237113529                 | 0,096641251        |
| Q29024           | -0,152450591                 | 0,267138169        |
| Q02110           | 0,120570149                  | 0,115351628        |
| Q02038           | -0,028203174                 | 0,038221954        |

|        |              |             |
|--------|--------------|-------------|
| Q007T2 | -0,395366026 | 0,456585213 |
| P82460 | -0,532224624 | 0,665162982 |
| P82125 | 0,043239486  | 0,044438247 |
| P81608 | 0,211131171  | 0,503970117 |
| Q03472 | -0,141093503 | 0,299976836 |
| P81405 | -0,168361753 | 0,333076814 |
| P80895 | 0,043178013  | 0,051742947 |
| P80276 | -0,081600579 | 0,084213092 |
| P80230 | -0,012959564 | 0,021102256 |
| P80229 | -0,058810706 | 0,066331191 |
| P80041 | 0,118419461  | 0,156400714 |
| P80031 | 0,084050961  | 0,14281615  |
| P80928 | -0,595652157 | 0,662833081 |
| Q03710 | -0,024854984 | 0,037526154 |
| Q06AB3 | 0,137714814  | 0,277008608 |
| Q06AU6 | -0,026872054 | 0,056051437 |
| Q28960 | -0,073125365 | 0,064433821 |
| Q2XQV4 | -0,020322937 | 0,026152719 |
| Q28943 | 0,012398551  | 0,00810174  |
| Q28833 | 0,451510578  | 0,819697294 |
| Q1KYT0 | -0,063734138 | 0,122670968 |
| Q19S50 | 0,071300212  | 0,042302403 |
| Q19QT7 | 0,245995355  | 0,229464277 |
| Q19PY3 | -0,233410281 | 0,471815927 |
| Q19KI0 | -0,125080201 | 0,163265926 |
| Q19AZ8 | 0,049380381  | 0,105207079 |
| Q0MVN8 | -0,245804604 | 0,294621531 |
| Q08094 | -0,207401092 | 0,454938485 |
| Q08092 | -0,394004104 | 0,868770135 |
| Q07717 | -0,279086118 | 0,63331024  |
| Q06AU7 | -0,138326356 | 0,255314665 |
| Q29041 | -0,345293136 | 0,443364381 |
| A0PFK7 | 0,010380641  | 0,008924128 |
| Q49I35 | -0,290964341 | 0,367832847 |
| Q2XVP4 | -0,042964105 | 0,030465848 |
| Q95334 | -0,252972065 | 0,202178026 |
| Q95333 | -0,122215041 | 0,104063767 |
| Q95332 | -0,158978526 | 0,189899806 |
| Q95281 | 0,275938101  | 0,700249889 |
| Q95276 | -0,056693781 | 0,11095739  |
| Q95250 | -0,165792928 | 0,364882915 |
| Q95342 | 0,30423182   | 0,893024793 |
| Q8WN98 | -0,391825155 | 0,486367901 |
| Q8SPS7 | 0,368898374  | 0,532524674 |
| Q8SPK0 | 0,056026491  | 0,092009916 |
| Q8MJ30 | -0,067491079 | 0,058010118 |
| Q8MJ14 | -0,662881188 | 1,048080281 |
| Q8MIR4 | -0,441336572 | 1,132310003 |
| Q8MIB3 | -0,312206985 | 0,749467465 |
| Q8SQ26 | -0,036623161 | 0,033758794 |

|        |              |             |
|--------|--------------|-------------|
| Q95ND5 | -0,066642553 | 0,132404273 |
| Q99028 | 0,040360444  | 0,060560231 |
| Q9BDJ5 | 0,270431041  | 0,576800177 |
| Q9TV62 | -0,057181333 | 0,085119937 |
| Q9TV61 | -0,498141437 | 0,589966509 |
| Q9TUQ3 | 0,125163657  | 0,42775581  |
| Q9TT35 | 0,111506052  | 0,140478919 |
| Q9TSX9 | -0,083610107 | 0,148094616 |
| Q9TRC7 | -0,017767635 | 0,025434923 |
| Q9N1F5 | -0,283623441 | 0,310292864 |
| Q9MY8  | -0,248528929 | 0,304149222 |
| Q9GMB0 | 0,122557654  | 0,222204891 |
| Q9GLP2 | 0,108702192  | 0,294193047 |
| Q9GLP1 | 0,91919245   | 0,905936562 |
| Q9GL51 | -0,226482728 | 0,121052364 |
| Q9GKX6 | 0,001240445  | 0,001649877 |
| Q9GJT2 | -0,160830813 | 0,181373047 |
| Q9BEC7 | -0,699364796 | 0,819802203 |
| Q8HZJ6 | 0,393831564  | 1,005205499 |
| Q866Y3 | 0,103752309  | 0,267072735 |
| Q863Z0 | -0,569674199 | 0,442402263 |
| Q7YQE5 | 0,089920296  | 0,162559836 |
| Q5S1S4 | -0,376967188 | 0,526022082 |
| Q5PYH3 | 0,115666254  | 0,215640333 |
| Q5ISC6 | -0,145443956 | 0,224268295 |
| Q5GN48 | -0,167697068 | 0,210696027 |
| Q58D68 | 0,065849473  | 0,090309337 |
| Q52NJ6 | -0,131962609 | 0,27112134  |
| Q52NJ4 | -0,120010691 | 0,235827712 |
| Q52NJ2 | -0,149362554 | 0,148061085 |
| Q52NJ1 | -0,017356538 | 0,024276837 |
| Q52I78 | -0,008693617 | 0,013107428 |
| Q4JHS0 | 0,397147856  | 1,14091863  |
| Q4GWZ2 | -0,029940933 | 0,018699452 |
| P80015 | -0,303134144 | 0,863058124 |
| Q3ZD69 | 0,156748274  | 0,244896125 |
| Q2YGT9 | 0,110994956  | 0,206896687 |
| Q5S1U1 | -0,163275485 | 0,131379514 |
| Q2XSV9 | 0,078111624  | 0,100547314 |
| Q64L94 | 0,383104314  | 0,846233399 |
| Q6PQZ1 | -0,158304553 | 0,145242465 |
| Q7SIB7 | 0,011438317  | 0,015691704 |
| Q7PCJ9 | -0,050149489 | 0,044797558 |
| Q7M2W6 | 0,284094062  | 0,682331446 |
| Q767L7 | 0,154510034  | 0,174804786 |
| Q767L6 | -0,513783574 | 1,264360491 |
| Q764M5 | -0,255754317 | 0,368368595 |
| Q711S8 | 0,14471159   | 0,249714514 |
| Q710C4 | -0,083462762 | 0,069013052 |
| Q6S4N2 | -0,303953306 | 0,322202333 |

|         |              |             |
|---------|--------------|-------------|
| Q6RI85  | -0,208492875 | 0,414800306 |
| Q6QAT1  | -0,231966679 | 0,484855167 |
| Q6QAT0  | -0,333617583 | 0,760763201 |
| Q6QAAQ1 | -0,030365322 | 0,061601235 |
| Q6Q7J2  | -0,053335042 | 0,071415405 |
| Q6Q2C2  | 0,197491235  | 0,154499546 |
| Q69DL0  | 0,284585955  | 0,749129427 |
| P79381  | 0,122284526  | 0,097471896 |
| P79324  | -0,084755095 | 0,146816023 |
| P79379  | -0,196410059 | 0,182729697 |
| P04163  | -0,116771268 | 0,169145311 |
| P03974  | -0,025068709 | 0,017136812 |
| P02554  | 0,139057378  | 0,107134768 |
| P02543  | -0,558924503 | 1,255503806 |
| P02189  | -0,220637484 | 0,287841701 |
| P04246  | -0,445921511 | 0,344565842 |
| P04178  | 0,104851607  | 0,093241918 |
| P02067  | -0,099242143 | 0,086897475 |
| P01846  | 0,140389968  | 0,446470315 |
| P01032  | -0,095183706 | 0,184073085 |
| P01025  | 0,256969697  | 0,844616215 |
| P00795  | -1,09536894  | 0,707953362 |
| P00690  | -0,117324605 | 0,20710978  |
| P00636  | -0,029052819 | 0,035841958 |
| P01965  | -0,162265555 | 0,166118929 |
| P04366  | 0,053341407  | 0,08778164  |
| P04574  | 0,169854858  | 0,252069691 |
| P05207  | -0,235678037 | 0,524786911 |
| P12067  | -0,069960236 | 0,129527625 |
| P12026  | 0,055563431  | 0,07621234  |
| P11708  | -0,01173696  | 0,015911649 |
| P11493  | -0,041299455 | 0,048302811 |
| P10775  | -0,247034543 | 0,209507364 |
| P10668  | -0,245524767 | 0,336317627 |
| P10173  | 0,123942346  | 0,254083649 |
| P63053  | -0,263645736 | 0,581244207 |
| P0C5I2  | -0,004586903 | 0,007232764 |
| P09571  | -0,126279156 | 0,339300332 |
| P08835  | -0,123692142 | 0,491536012 |
| P08132  | -0,106119477 | 0,207366474 |
| P08059  | 0,00310421   | 0,004094666 |
| P06867  | 0,183641506  | 0,714460464 |
| P06348  | -0,101896667 | 0,177872835 |
| P00571  | 0,02500126   | 0,033184163 |
| P12069  | -0,432945925 | 0,620558959 |
| P00503  | -0,069690656 | 0,126391739 |
| P00355  | 0,054587427  | 0,059989957 |
| F1SAM7  | -0,184814201 | 0,391537762 |
| F1RWC3  | -0,765135691 | 1,214530619 |
| F1RQM2  | -0,041943335 | 0,067059755 |

|        |              |             |
|--------|--------------|-------------|
| F1RKQ4 | 0,062957777  | 0,066202935 |
| D7PF45 | 0,152627892  | 0,224716396 |
| D2SW95 | 0,05537306   | 0,081473561 |
| O02668 | 0,143091944  | 0,467199938 |
| C0HL13 | -0,58634161  | 0,979696514 |
| A7Y521 | -0,051691063 | 0,064868147 |
| A7TX81 | 0,041504363  | 0,055341333 |
| A5GFY8 | 0,231267659  | 0,203406381 |
| A4Z6H1 | -0,145906231 | 0,2317534   |
| A1YIZ1 | -0,346735134 | 0,322584719 |
| A1XQU1 | -0,042130919 | 0,048067187 |
| B1PK17 | -0,012981877 | 0,007580284 |
| O02705 | 0,120457045  | 0,157128051 |
| O02772 | 0,196636331  | 0,162406663 |
| O18994 | 0,029838025  | 0,043796491 |
| P00348 | -0,238504923 | 0,249349526 |
| P00346 | -0,050844996 | 0,099519787 |
| P00339 | -0,41482216  | 0,369016347 |
| P00336 | -0,037160336 | 0,059481031 |
| P00172 | -0,471637184 | 0,651631809 |
| O97788 | -0,138252981 | 0,253471734 |
| O97763 | -0,14167369  | 0,29383557  |
| O97507 | 0,111206871  | 0,240190809 |
| O77591 | -0,392974379 | 0,841124089 |
| O62839 | -0,29552503  | 0,606348592 |
| O46658 | -0,413871724 | 0,628836681 |
| O46560 | 0,303858396  | 0,328939065 |
| O46409 | 0,011542663  | 0,021840484 |
| O19063 | -0,040924909 | 0,039271098 |
| O19062 | 0,556775117  | 0,534998989 |
| P00371 | -0,257833442 | 0,566923626 |
| P79380 | 0,094806843  | 0,101136766 |
| P12309 | -0,409758041 | 1,070682675 |
| P14287 | -0,469676207 | 0,516619756 |
| P53603 | 0,024922284  | 0,018407522 |
| P52552 | -0,333366164 | 0,562372856 |
| P51779 | -0,156071086 | 0,145415402 |
| P51525 | -0,396275655 | 0,410398084 |
| P50828 | -0,02107095  | 0,060315952 |
| P50584 | -0,459974717 | 0,373006054 |
| P54612 | -0,09493543  | 0,046812271 |
| P50578 | 0,040558995  | 0,043871454 |
| P50390 | -0,121438422 | 0,392248694 |
| P50133 | 0,243016394  | 0,438303399 |
| P49924 | -0,376736624 | 0,333254272 |
| P49666 | 0,030256189  | 0,034813252 |
| P49171 | -0,070158808 | 0,129945567 |
| P48819 | 0,137845504  | 0,483338883 |
| P50447 | -0,017147558 | 0,043762315 |
| P59083 | 0,013254546  | 0,016352533 |

|        |              |             |
|--------|--------------|-------------|
| P60662 | 0,027491808  | 0,036752965 |
| P60982 | -0,455422505 | 0,305078274 |
| P79378 | 0,181564387  | 0,487170383 |
| P79376 | -0,083746385 | 0,147497287 |
| Q9TV69 | -0,416587178 | 0,562506982 |
| P79303 | -0,309430994 | 0,289949216 |
| P79273 | -0,234810626 | 0,435281699 |
| P79263 | 0,380739273  | 1,086329267 |
| P68137 | 0,33166921   | 0,314687054 |
| P63246 | -0,468850752 | 0,684254413 |
| P62936 | -0,083447801 | 0,223135739 |
| P62844 | 0,320084858  | 0,617856433 |
| P62831 | -0,169032492 | 0,333259392 |
| P62802 | -0,451261292 | 0,47298989  |
| P62279 | 0,083612872  | 0,088500608 |
| P62197 | 0,248597914  | 0,436905073 |
| P61220 | 0,37239131   | 0,954475349 |
| P47788 | -0,11425145  | 0,168047387 |
| P12682 | -0,204291005 | 0,417885209 |
| P46405 | -0,310090999 | 0,647334255 |
| P43030 | -0,254185742 | 0,576692539 |
| P20305 | 0,070477343  | 0,213600616 |
| P19620 | 0,12521143   | 0,204648482 |
| P19205 | 0,60960245   | 0,60926958  |
| P19133 | -0,140582654 | 0,136699246 |
| P19130 | -0,090416084 | 0,141029547 |
| P18650 | -0,183253774 | 0,242964062 |
| P20735 | 0,295506722  | 0,518813391 |
| P18648 | 0,076154013  | 0,188861754 |
| P16293 | 0,214216617  | 0,419065636 |
| P15468 | -0,359505965 | 0,384664263 |
| P15145 | -0,253263901 | 0,501043157 |
| P14477 | 1,369161337  | 0,980727822 |
| P14460 | 0            | NaN         |
| P14332 | -0,241892666 | 0,337909935 |
| P17560 | -0,591997187 | 0,52216151  |
| P22411 | -0,270020009 | 0,403512111 |
| P22412 | -0,305777296 | 0,328990129 |
| P23687 | 0,677102482  | 1,27206596  |
| P42831 | -0,313432333 | 0,766535691 |
| P37111 | 0,080592587  | 0,094890357 |
| P36968 | 0,084872595  | 0,261605759 |
| P32394 | 0,334125093  | 0,633880693 |
| P30034 | -0,328141593 | 0,317635064 |
| P29797 | -0,26256565  | 0,570779571 |
| P29700 | 0,05919615   | 0,177366807 |
| P29269 | 0,012376607  | 0,018987854 |
| P28491 | -0,089899855 | 0,101216159 |
| P27917 | -0,032373547 | 0,044546044 |
| P27485 | -0,444460146 | 0,889645975 |

|        |              |             |
|--------|--------------|-------------|
| P26893 | -0,129511402 | 0,242074823 |
| P26234 | 0,212477325  | 0,342371251 |
| P26044 | 0,377041119  | 0,342262261 |
| P24853 | -0,480310238 | 1,198422387 |
| P43367 | -0,294955379 | 0,565618117 |
| Q9TVC1 | 0,082331964  | 0,06239866  |

The difference indicates doxycycline vs. control group. Proteins were considered significant if  $-\log_{10}(\text{p-value}) > 1.3$ . Significant p-values are marked bold.

Abbreviations: N/A = not available
