# Supplementary material for: Doxycycline Alters the Porcine Renal Proteome and Degradome during Hypothermic Machine Perfusion
Source: MDPI journal article supplement (doi:10.3390/cimb44020039), 2022-01-23
Supplement: s1 [file s1]

**Table S3.** Identified degradation products post-reperfusion (T240).

| Accession number | Position in protein | Protein substrate         | Difference (DOXY vs Control) | -Log10 (P-value)   |
|------------------|---------------------|---------------------------|------------------------------|--------------------|
| Q4KRV1           | [27-39]             | ASQIEDQAEQFFR             | -1,46961775                  | <b>1,344632291</b> |
| P06348           | [68-82]             | ALAAAGYDVEKNNSR           | -1,834505811                 | <b>1,937166701</b> |
| Q6PQZ1           | [237-243]           | SSDLTDR                   | -1,627484472                 | <b>1,308548311</b> |
| Q9GMB0           | [26-38]             | SPEALPLVNEDVK             | 1,361178837                  | <b>1,42029195</b>  |
| P50441           | [400-413]           | SLGGGFHCWTC DVR           | 2,363029148                  | <b>2,1979764</b>   |
| P80021           | [254-262]           | STVAQLVKR                 | 2,595956121                  | <b>2,66038676</b>  |
| P01965           | [1-11]              | VLSAADKANVK               | 3,872360738                  | <b>1,853148995</b> |
| P02067           | [4-31]              | EEKEAVLGLWGKVVNDEVGGEA    | 2,976594205                  | <b>2,549326958</b> |
| P20305           | [426-441]           | QHGMDDDG TGQKQIWR         | 2,544495525                  | <b>2,858050497</b> |
| Q71LE2           | [19-27]             | KQLATKAAR                 | 2,545870657                  | <b>2,475343653</b> |
| O02705           | [603-613]           | STYGWTANMER               | 2,326072868                  | <b>2,291372547</b> |
| P01965           | [1-9]               | VLSAADKAN                 | 3,335860627                  | <b>2,458842047</b> |
| Q9GMB0           | [26-39]             | SPEALPLVNEDVKR            | 2,553414504                  | <b>2,658335044</b> |
| P14477           | [1-13]              | AIDYDEDEDGRPK             | 1,989643943                  | <b>1,869734139</b> |
| Q9MZ15           | [278-294]           | SINAGGHKLGLALELEA         | 2,237813571                  | <b>2,51187527</b>  |
| P02543           | [430-440]           | SLPLVDTHSKR               | 1,29316403                   | <b>1,482414286</b> |
| Q007T0           | [31-38]             | TAAATAPR                  | 2,688556539                  | <b>1,402358045</b> |
| P80021           | [447-463]           | AQFGSD LDAATQQLSR         | 2,124042105                  | <b>1,637939485</b> |
| P62279           | [5-19]              | HAPGKGLSQSALPYR           | 2,109199984                  | <b>2,227954405</b> |
| Q6QAAQ1          | [53-62]             | YVGDEA QSKR               | 1,688549853                  | <b>1,893923559</b> |
| P81140           | [363-372]           | GISDEYHVIR                | 1,630846342                  | <b>2,117351532</b> |
| P04366           | [5-24]              | SPVLTL PNDIQVQENFDLSR     | 2,201940713                  | <b>1,589958873</b> |
| P00503           | [2-32]              | IVFAEVPQAQPVLVFKLIADFREDI | 2,971584392                  | <b>2,666090315</b> |
| Q6QAAQ1          | [234-254]           | SSLEKSYELPDGQVITIGNER     | 2,591555225                  | <b>2,626028358</b> |
| P00348           | [149-162]           | SSLQITSLANATTR            | 2,522485167                  | <b>2,438963471</b> |
| Q29307           | [26-34]             | SSDTPEGVR                 | 1,437123686                  | <b>1,880169569</b> |
| P80021           | [186-204]           | REPMQTG IKA VDSLVI GR     | 2,631893034                  | <b>1,319978006</b> |
| Q29550           | [19-33]             | GQPASPPVVDTAQGR           | 1,709115875                  | <b>1,952636149</b> |
| O19069           | [143-154]           | ITEGIPQQDMVR              | 2,381444872                  | <b>2,344821579</b> |
| P28839           | [1-9]               | TKGLVLGIY                 | 2,347059597                  | <b>1,587392487</b> |
| P41367           | [380-392]           | GFNTEYPVEKL MR            | 2,303338655                  | <b>2,00401483</b>  |

|        |           |                           |             |                    |
|--------|-----------|---------------------------|-------------|--------------------|
| P80021 | [46-58]   | TGTAEVSSILEER             | 0,758423628 | <b>1,531676288</b> |
| Q6QAQ1 | [273-290] | GIHETTFNSIMKCDVDIR        | 1,327505804 | <b>1,299676068</b> |
| P01965 | [1-8]     | VLSAADKA                  | 3,239788332 | <b>3,018813202</b> |
| P01965 | [12-31]   | AAWGKVGQGAGAHGAEALER      | 0,98314961  | <b>1,861941283</b> |
| Q29371 | [43-53]   | APPTAYIDFAR               | 1,320549128 | <b>1,571370447</b> |
| P62936 | [9-19]    | DIAVDGEPLGR               | 2,598131984 | <b>2,375747488</b> |
| P80031 | [3-11]    | YTITYFPVR                 | 1,725892376 | <b>2,116568107</b> |
| P08059 | [107-124] | SNTPILVGKDVMPEVNR         | 2,366774738 | <b>2,030453992</b> |
| Q0QF01 | [199-207] | SLLHTLYGR                 | 2,136529182 | <b>2,095965321</b> |
| P28491 | [21-36]   | IYFKEQFLDGDGWTDR          | 1,749788404 | <b>1,837288915</b> |
| Q8MJ39 | [26-37]   | LESYEINPFLNR              | 2,287093584 | <b>1,921396722</b> |
| P01965 | [1-9]     | VLSAADKAN                 | 3,198535463 | <b>2,632968621</b> |
| P53590 | [258-270] | DAKINFDDNAEFR             | 2,605868523 | <b>2,755583414</b> |
| P00348 | [148-162] | TSSLQITSLANATTR           | 2,014008999 | <b>1,348922235</b> |
| P01025 | [747-762] | SDLDEEIIPEEDIISR          | 0,859011505 | <b>1,421924759</b> |
| P80928 | [5-12]    | VVNTNVPR                  | 1,859319517 | <b>2,323060853</b> |
| P00346 | [27-52]   | 'AVLGASGGIGQPLSLLLKNSPLVS | 4,113600236 | <b>2,678584029</b> |
| Q2QLE2 | [2-21]    | GLETEKADVQLFMDDDSYSR      | 2,533496167 | <b>2,585528534</b> |
| P02067 | [2-9]     | VHLSAEEK                  | 3,973790524 | <b>1,920970757</b> |
| Q4FAT7 | [23-35]   | LLQGGMLYPQESR             | 2,07619197  | <b>1,415638192</b> |
| P62802 | [25-36]   | DNIQGITKPAIR              | 2,25487199  | <b>2,258203525</b> |
| Q2XVP4 | [54-64]   | SETGAGKHVPR               | 2,251696873 | <b>1,299501008</b> |
| P51779 | [27-36]   | ILGGQEAKSH                | 2,34062529  | <b>2,333682591</b> |
| Q95339 | [4-10]    | VVPLKDR                   | 2,497631814 | <b>2,645530521</b> |
| P82460 | [2-21]    | VKQIESKYAFQEALNSAGEK      | 2,617997425 | <b>3,099188913</b> |
| Q0MVN8 | [188-201] | IVLQNGAHEVFNHR            | 1,657768931 | <b>1,574605874</b> |
| P50828 | [24-39]   | HPLSLTAGPKHGAEGR          | 0,670712831 | <b>1,443406966</b> |
| Q2F7Z7 | [36-50]   | EAFDSVLGDTASCHR           | 2,634973983 | <b>2,994494827</b> |
| P79384 | [30-38]   | TQPVSVNER                 | 0,719865195 | <b>1,734355062</b> |
| Q0MVN8 | [193-201] | GAHEVFNHR                 | 0           | NaN                |
| P00889 | [28-47]   | ASSTNLKDILADLIPKEQAR      | 1,420966715 | <b>0,962985232</b> |
| P23695 | [25-48]   | AYRPSETLCGGELVDTLQFVCGR   | 0           | NaN                |
| Q07717 | [83-100]  | LLVHTEFTPNAVDQYSCR        | 0           | NaN                |

|        |             |                           |              |             |
|--------|-------------|---------------------------|--------------|-------------|
| P80229 | [264-275]   | LELLEVNVLPR               | 1,025953666  | 0,90730132  |
| Q19KI0 | [2-8]       | AWNTNLR                   | -1,331264745 | 1,147343117 |
| P50441 | [42-62]     | ATASSGNSCAADDKATDPLPK     | 0            | NaN         |
| Q95339 | [2-10]      | ASVVPLKDR                 | -0,031595551 | 0,042222188 |
| P29700 | [294-304]   | AVPPGIPPVHR               | 0            | NaN         |
| P41367 | [24-53]     | AVPQCEPGSGFSFELTEQQKEFQ/  | -0,183630282 | 0,054865641 |
| A1XQT2 | [2-12]      | ATSSLTKPQMR               | 0,075164006  | 0,058410155 |
| Q5S1U1 | [29-38]     | LFDQAFGLPR                | -0,230243177 | 0,077778108 |
| Q29550 | [15-33]     | ATWAGQPASPPVVDTAQGR       | 0            | NaN         |
| P01965 | [13-31]     | AWGKVGGQAGAHGAEALER       | 0,043703383  | 0,032730858 |
| Q6QAQ1 | [29-37]     | AVFPSIVGR                 | 1,602475863  | 1,037308424 |
| P27917 | [21-41]     | IEAEDTSLLDKMQDYVKQATR     | 0,207257027  | 0,228740308 |
| P06348 | [69-82]     | LAAAGYDVEKNNSR            | 1,396938081  | 0,755282836 |
| P80021 | [135-149]   | GAIVDVPVGEELLGR           | 0,831711548  | 0,269286879 |
| Q71LE2 | [104-117]   | LFEDTNLCAIHAQR            | 1,479276559  | 0,924818896 |
| Q8WN93 | [23-39]     | ETEEENPDDLIQLTVTR         | 0            | NaN         |
| Q9MY8  | [3-33]      | ELPEMYDYDLIIIGGGSGGLAAAKI | 0            | NaN         |
| Q6Q7J2 | [319-328]   | IIIPQNNQVNR               | 1,450342144  | 0,434172403 |
| P00889 | [26-47]     | ASASSTNLKDILADLIPKEQAR    | 0,156231206  | 0,154135216 |
| Q6QAQ1 | [231-254]   | ASSSSLEKSYELPDGQVITIGNER  | 1,746545315  | 0,778931149 |
| P51779 | [27-40]     | ILGGQEAQKSHRPY            | 0,768577156  | 0,320496348 |
| P51779 | [27-38]     | ILGGQEAQKSHR              | 0,254348486  | 0,292709772 |
| C0HL13 | [2757-2773] | CDHYNDCGDNDSDESGCR        | 0            | NaN         |
| Q75NG9 | [87-95]     | LIDSHFEAR                 | 0            | NaN         |
| A5GZW8 | [57-70]     | ASSKAASLHWTGER            | 0,037379736  | 0,049265304 |
| P79273 | [25-42]     | LHTIFQSVELPETYQMLR        | 0            | NaN         |
| Q29268 | [2-20]      | APSGLKAVVGEKILSGVIR       | -0,068566733 | 0,024278472 |
| P10173 | [1-7]       | ASQDSFR                   | -0,046928885 | 0,088276412 |
| Q71LE2 | [96-117]    | ASEAYLVGLFEDTNLCAIHAQR    | 0            | NaN         |
| P79273 | [25-42]     | LHTIFQSVELPETYQMLR        | 0            | NaN         |
| P12037 | [51-66]     | ARFAQEAEARVELQK           | 0,117486182  | 0,212083783 |
| P00503 | [2-26]      | APPSVFAEVPQAQPVLVFKLIADFI | 0,295379724  | 0,557849484 |
| P79273 | [25-42]     | LHTIFQSVELPETYQMLR        | 0            | NaN         |

|         |           |                         |              |             |
|---------|-----------|-------------------------|--------------|-------------|
| Q007T0  | [29-38]   | AQTAAATAPR              | 0,547553692  | 0,396872677 |
| P79273  | [25-38]   | LHTIFQSVELPETY          | 0            | NaN         |
| Q28943  | [2-21]    | APVLSKDVADIESILALNPR    | 0,786640964  | 0,361628402 |
| Q4FAT7  | [23-35]   | LLQGGMLYPQESR           | -0,309726172 | 0,17309858  |
| Q95332  | [2-8]     | APVGDKK                 | 2,071187651  | 1,079192584 |
| D0VWV4  | [30-40]   | LGTTAKEEMER             | 0,060090905  | 0,063123682 |
| Q5S3G4  | [32-49]   | ASGGGVPTDEEQATGLER      | 0,18846689   | 0,357263568 |
| P08835  | [86-105]  | CDKSIHTLFGDKLCAIPSLR    | 0            | NaN         |
| P02067  | [6-31]    | EKEAVLGLWGKVVNVDEVGGEAL | 2,198192622  | 0,96701244  |
| Q6QAAQ1 | [17-28]   | CKAGFAGDDAPR            | 0            | NaN         |
| P80229  | [265-275] | ELLEVVNHLPR             | -0,180081691 | 0,075598263 |
| Q6QAAQ1 | [269-290] | MESCGIHETTFSIMKCDVDIR   | 0            | NaN         |
| P28491  | [18-36]   | EPTIYFKEQFLDGDGWTDR     | 0,061306888  | 0,065551714 |
| P48819  | [412-427] | EPIQSVYFFSGEEYYR        | 1,012392842  | 0,513942858 |
| P04366  | [18-24]   | ENFDLSR                 | -0,194943418 | 0,067873225 |
| P02554  | [3-14]    | EIVHIQAGQCGN            | 0            | NaN         |
| Q6QAAQ1 | [241-254] | ELPDGQVITIGNER          | 0,784089625  | 1,158025085 |
| P02067  | [91-105]  | ELHCDQLHVDPENFR         | -0,450011766 | 0,171645306 |
| P27917  | [24-41]   | EDTSLLDKMQDYVKQATR      | 1,511849791  | 0,852572838 |
| Q71LE2  | [74-84]   | EIAQDFKTDLR             | -0,10454254  | 0,032198899 |
| Q7M329  | [159-173] | EKVQTLGQIELCLTR         | 1,317688338  | 0,785773542 |
| P37111  | [9-17]    | EHPSVTLFR               | 1,000645111  | 0,758413114 |
| P50447  | [25-39]   | EGLQGHAVQETDVPR         | 0,140349414  | 0,231348335 |
| P37111  | [7-17]    | EGEHPSVTLFR             | 1,077624963  | 0,605750559 |
| A5GFQ5  | [46-52]   | EETDWVR                 | -0,150292554 | 0,220032339 |
| P79263  | [807-829] | ETLYSVMPLKITMDKAGLLLLS  | 0            | NaN         |
| Q29092  | [24-39]   | EVDVDGTVEEDLGKSR        | -0,320276041 | 0,125652797 |
| P15145  | [895-904] | FSNLIQGVTR              | -0,026256781 | 0,029291063 |
| Q29095  | [32-40]   | FQEDKFLGR               | -0,035846662 | 0,009576032 |
| Q9XT00  | [70-81]   | FQADVSEAETAR            | 0            | NaN         |
| Q711S8  | [24-35]   | FPVYDYDPSSLR            | 0,401645166  | 0,529249385 |
| P04366  | [30-43]   | FHVAVGSTCPWLKR          | 0,718542695  | 0,223582134 |
| Q0QF01  | [33-42]   | FHFTVDGNKR              | 0,1767592    | 0,275631306 |

|         |             |                          |              |             |
|---------|-------------|--------------------------|--------------|-------------|
| P80021  | [61-73]     | GADTSVDLEETGR            | 0            | NaN         |
| C0HL13  | [4592-4605] | FENPIYAETENEPK           | 0            | NaN         |
| P29804  | [29-44]     | FANDATFEIKKCDLHR         | 0,238935127  | 0,134997578 |
| P29804  | [29-38]     | FANDATFEIK               | -0,135869773 | 0,036878617 |
| Q2EN81  | [24-40]     | FAKLVRPPVQIYGIEGR        | 0,060878791  | 0,105625002 |
| Q6QAAQ1 | [21-28]     | FAGDDAPR                 | 1,625187021  | 0,963285731 |
| Q29183  | [23-39]     | EYVGLSANQCAVPAKDR        | -0,654377705 | 0,312595337 |
| Q29122  | [506-522]   | EVHYVDNQDCIDLIEAR        | 0,103513687  | 0,038078029 |
| P62936  | [8-19]      | FDIAVDGEPLGR             | -0,019980535 | 0,007279731 |
| P63221  | [4-15]      | DAGEFVDLYVPR             | 1,377450309  | 0,736436405 |
| C0HL13  | [3938-3966] | {HLVCDDVDDCGDHFDETGCNTC  | 0            | NaN         |
| P14477  | [1-19]      | AIDYDEDEDGRPKVHVDAR      | 1,775955158  | 1,021602569 |
| P01965  | [12-31]     | AAWGKVGQGAGAHGAEALER     | 0            | NaN         |
| Q6QAAQ1 | [295-312]   | ANTVLSGGTTMYPGIADR       | 0            | NaN         |
| P50441  | [52-82]     | {ATDPLPKDCPVSSYNEWDPLEEV | 0            | NaN         |
| P79382  | [2-9]       | ADLTELMK                 | 0,175359498  | 0,061954683 |
| P80021  | [62-73]     | ADTSVDLEETGR             | -0,235930753 | 0,249608413 |
| A1Z623  | [31-39]     | AEFSSESCR                | 0,355510219  | 0,557018574 |
| P00371  | [84-99]     | AANMGLTPVSGYNLFR         | 0            | NaN         |
| Q8SPS7  | [19-41]     | AETGNEATDATDDSCPKPPEIPK  | 0            | NaN         |
| P00346  | [66-74]     | ADLSHIETR                | 1,282024604  | 0,665403266 |
| O02705  | [599-613]   | CIVTSTYGWTANMER          | 0            | NaN         |
| O62839  | [411-424]   | APEQTHSALEHCTR           | 0            | NaN         |
| P81405  | [7-19]      | CIQMVTDLQNAVR            | -0,338762165 | 0,120088396 |
| C0HL13  | [3645-3675] | WKCDVDNDCGDYSDEPLQECM{   | 0            | NaN         |
| Q6QAAQ1 | [17-28]     | CKAGFAGDDAPR             | 0,308717508  | 0,432128865 |
| Q8SPS7  | [19-41]     | AETGNEATDATDDSCPKPPEIPK  | -0,592791182 | 0,280685257 |
| C0HL13  | [3951-3966] | CGDHFDETGCNTGEER         | 0            | NaN         |
| P06348  | [71-82]     | AAGYDVEKNNSR             | 0,236901441  | 0,395676981 |
| P80147  | [31-54]     | AAKVDVEFDYDGPLMKTEVPGP   | 1,751870636  | 1,037715025 |
| Q0QF01  | [45-75]     | DAISTQYPVVDHEFDVAVVGAGC  | 0            | NaN         |
| Q0QF01  | [45-75]     | DAISTQYPVVDHEFDVAVVGAGC  | -1,352118926 | 1,144183358 |
| P00346  | [25-52]     | .VAVLGASGGIGQPLSLLKNSPLV | 1,050496593  | 0,621614344 |

|         |                  |                          |              |             |
|---------|------------------|--------------------------|--------------|-------------|
| Q2EN81  | [25-40]          | AKLVRPPVQIYGIEGR         | -0,034663801 | 0,034709611 |
| Q06AU5  | [2-24]           | .GGGAGDPGQGAAAAAAPET     | 0            | NaN         |
| Q6QAAQ1 | [19-28]          | AGFAGDDAPR               | 0,323503282  | 0,563949175 |
| P50441  | [51-82]          | KATDPLPKDCPVSSYNEWDPLEE' | 0,218879904  | 0,08004153  |
| Q04967  | [225-238];A5A8V7 | AGDTHLGGEDFDNR           | -1,278132409 | 1,10698603  |
| P50390  | [23-41]          | AGAGESKCPLMVKVLDAVR      | -0,727960248 | 0,226050794 |
| Q8MK48  | [2-15]           | AFNDLLLQVGGVGR           | 0,499110782  | 1,120106269 |
| P14460  | [1-17]           | AEVQDKGEFLAEGGGVR        | 1,617061606  | 0,848263432 |
| Q8SPS7  | [19-49]          | NEATDATDDSCPKPPEIPKGYVE+ | 0            | NaN         |
| Q8SPS7  | [19-49]          | NEATDATDDSCPKPPEIPKGYVE+ | 0,766847628  | 0,169668709 |
| Q8SPS7  | [19-49]          | NEATDATDDSCPKPPEIPKGYVE+ | 0            | NaN         |
| P47788  | [8-25]           | AGDALDVAAPCSAVNYLR       | 0            | NaN         |
| P79263  | [28-46]          | HKNDINIYSLTVDSKVSSR      | 0,385734036  | 0,100310267 |
| Q29318  | [11-20]          | LVVHGPGDLR               | 0,281731514  | 0,10975623  |
| P33198  | [142-157]        | HAHGDQYKATDFVVDR         | 0,757877876  | 0,279697794 |
| Q29048  | [72-81]          | GVSVDGPVLR               | -0,044258354 | 0,016944449 |
| P00571  | [116-128]        | LYVDAGPETMTKR            | -0,340646233 | 0,146996509 |
| P09571  | [455-462]        | SCHTAVDR                 | 0            | NaN         |
| Q28955  | [2-8]            | PLLVEGR                  | 1,133592797  | 0,985107965 |
| Q19KI0  | [2-8]            | AWNTNLR                  | 0,017431962  | 0,019156974 |
| A1XQT2  | [4-12]           | SSLTKPQMR                | 0,646808872  | 0,869472431 |
| P16225  | [138-143]        | FLLSKR                   | -1,484027573 | 0,644734074 |
| Q6RVA9  | [3-19]           | GGKYVDSEGHLYTVPIR        | -0,069561507 | 0,026091078 |
| Q6QAAQ1 | [89-95]          | TFYNELR                  | -1,600277272 | 0,950096462 |
| P80021  | [448-463]        | QFGSDLDAATQQLLSR         | -0,003090637 | 0,001187287 |
| P08835  | [25-33]          | DTYKSEIAH                | 1,416500068  | 0,690759659 |
| P01025  | [958-997]        | DQVPDTESETKILLQGTPVAQMV  | 0            | NaN         |
| P08835  | [27-34]          | YKSEIAHR                 | 1,056732171  | 0,486197947 |
| P80021  | [285-301]        | LQYLAPYSGCSMGEYFR        | 0            | NaN         |
| P62802  | [81-93]          | TVTAMDVVYALKR            | 1,317323625  | 1,105263617 |
| P00371  | [93-99]          | SGYNLFR                  | -0,744076562 | 0,347122168 |
| P29700  | [305-310]        | SHYDLR                   | 0,290615693  | 0,078791047 |
| P05027  | [176-182]        | VIKLNLR                  | 0,031912683  | 0,010100025 |

|        |             |                      |              |             |
|--------|-------------|----------------------|--------------|-------------|
| P01965 | [15-31]     | GKVGQAGAHGAEALER     | 0            | NaN         |
| P29797 | [2-13]      | GCLGNSKTEDQR         | -0,05538417  | 0,023076172 |
| P14460 | [9-17]      | FLAEGGGVR            | 2,324737784  | 1,062202852 |
| Q4U116 | [336-342]   | SYHEIGR              | 0,274071824  | 0,694951432 |
| P83662 | [1-8]       | MKIDIHSH             | -1,340080396 | 1,070056666 |
| P26042 | [481-495]   | DEQDENGAEASADLR      | 0            | NaN         |
| Q6QAQ1 | [178-183]   | LDLAGR               | -0,224217142 | 0,098647885 |
| P11708 | [143-157]   | SAPSIPKENFSCLTR      | -0,4531607   | 0,190423983 |
| Q8WN98 | [1-20]      | MKDPDPSQVYRPDMDPEAAK | -0,397491402 | 0,126415698 |
| Q71LE2 | [58-64]     | STELLIR              | 0,147486615  | 0,218731691 |
| P01025 | [671-677]   | VQLMEKR              | -0,051450751 | 0,013527234 |
| P50441 | [39-55]     | TQAATASSGNSCAADDK    | 0            | NaN         |
| Q6SEG5 | [1-19]      | MLKPMEinPEMLNKVLTR   | 0            | NaN         |
| Q5U9S1 | [109-114]   | LEGQIR               | 0            | NaN         |
| P50390 | [26-41]     | GESKCPLMVKVLDVR      | 1,483273647  | 1,059337006 |
| Q1KYT0 | [247-253]   | AASEFYR              | -0,062794383 | 0,021883406 |
| C0HL13 | [3193-3203] | NIEPYLFSNR           | -0,528026089 | 0,283767816 |
| O97763 | [20-25]     | EPVHFR               | -1,550960526 | 1,203851326 |
| Q9TSX9 | [3-22]      | GGLLGDEAPNFEANTTIGR  | 0            | NaN         |
| Q6QAQ1 | [301-312]   | GGTTMYPGIADR         | -0,237313279 | 0,10638857  |
| P26044 | [2-8]       | PKPINVR              | 1,536289473  | 0,786286854 |
| A1E295 | [78-87]     | MILPKSFDAR           | 0,089480609  | 0,02373515  |
| P00791 | [16-23]     | LVKVPLVR             | 0,457116873  | 0,136167833 |
| P00636 | [144-158]   | STDEPSEKDALQPGR      | -0,307752799 | 0,122145102 |
| Q7YS91 | [40-60]     | TSSATSPSSHLPGSLSEVER | 0            | NaN         |
| Q29308 | [3-16]      | GVTVKDVNQQEFVR       | -0,473933587 | 0,280089137 |
| Q71LE2 | [107-117]   | DTNLCAIHAKR          | -0,187278264 | 0,078896651 |
| P08059 | [22-27]     | SDLNLR               | 0,089904234  | 0,132475729 |
| P80928 | [64-74]     | SIGKIGGAQNR          | 0,26483777   | 0,487481286 |
| P81140 | [12-20]     | SSRPEFDWR            | -0,166855024 | 0,084909806 |
| P17741 | [2-10]      | GKGDPNKPR            | -1,625856902 | 1,174220535 |
| P00795 | [1-8]       | GPIPEVLK             | -0,306482443 | 0,118322162 |
| P62802 | [57-68]     | GVLKVFLNVIR          | -0,071373135 | 0,027568364 |

|        |                |                          |              |             |
|--------|----------------|--------------------------|--------------|-------------|
| P01025 | [967-997]      | 'DTESETKILLQGTPVAQMVEDAI | 0            | NaN         |
| P50828 | [30-39]        | AGPKHGAEGR               | -0,471166939 | 0,167432295 |
| P50441 | [38-62]        | TQAATASSGNSCAADDKATDPLP  | 0            | NaN         |
| O02668 | [68-73]        | STITSR                   | 0,387789506  | 0,80306503  |
| Q66RM2 | [1-6]          | MNIFDR                   | 0,501750654  | 0,168921181 |
| Q04967 | [39-51];A5A8V7 | TPSYVAFTDTER             | 0            | NaN         |
| Q04967 | [68-74];A5A8V7 | TVFDAKR                  | 0,960805195  | 0,260485435 |
| Q95333 | [22-29]        | HPKSLNQR                 | 0            | NaN         |
| P80021 | [195-204]      | AVDSLVPGR                | 0,045361434  | 0,014462663 |
| Q8WNV7 | [21-27]        | ASTGVER                  | -0,470561299 | 0,226371021 |
| C0HL13 | [3068-3078]    | EETTCPPHQFR              | -0,161612925 | 0,061222262 |
| C0HL13 | [4036-4044]    | SMSEHYGER                | 0            | NaN         |
| P01965 | [1-7]          | VLSAADK                  | -0,643476119 | 0,278457027 |
| Q07717 | [21-32]        | VARPPKVQVYSR             | 1,606228658  | 1,098172438 |
| Q29550 | [17-33]        | WAGQPASPPVVDTAQGR        | 0            | NaN         |
| P02067 | [35-41]        | VYPWTQR                  | 2,136185337  | 0,91069826  |
| P29700 | [18-25]        | HGPILGYR                 | 0,538665427  | 0,677972942 |
| O11780 | [24-38]        | GPAKSPYQLVLQHSR          | 0            | NaN         |
| P29700 | [335-356]      | GAQSPIPAADGSVPVVRPCGR    | 0            | NaN         |
| P50828 | [26-39]        | LSLTAGPKHGAEGR           | 1,417339277  | 0,725179796 |
| Q29318 | [9-20]         | LSLVVHGPDLR              | 1,170520459  | 0,513138848 |
| P80147 | [28-54]        | AAAKVDVEFDYDGPLMKTEVPG   | 0,576811117  | 0,238150836 |
| Q2XVP4 | [286-308]      | LSVAEITNACFEPANQMVKCDPR  | 0            | NaN         |
| P50828 | [28-39]        | LTAGPKHGAEGR             | 0,320205284  | 0,444245476 |
| Q6QAQ1 | [105-116]      | LTEAPLNPKANR             | 0,502940704  | 0,170564667 |
| Q8WNV7 | [377-386]      | LTERPIFYR                | 1,288022722  | 1,257273705 |
| Q9N0F1 | [196-222]      | SKPVSAVKPTAAPPVAEPGAVKG  | 1,271412686  | 0,813498781 |
| Q8SPS7 | [103-120]      | IMGGSLDAKGSFPWQAKM       | 0,972379667  | 0,267122676 |
| Q29092 | [647-660]      | LVASQYGWSGNMER           | 0,289026392  | 0,411051902 |
| P02554 | [65-77]        | LVDLEPGTMDSVR            | 1,291463008  | 0,90865495  |
| Q71LE2 | [101-117]      | LVGLFEDTNLCAIHAKR        | 0,328658528  | 0,149886265 |
| P50828 | [254-271]      | LVLALLSDNHGATYAFR        | -0,130372668 | 0,048345469 |
| Q2EN81 | [27-40]        | LVRPPVQIYIGIEGR          | 1,659043982  | 1,106342957 |



|         |           |                          |              |             |
|---------|-----------|--------------------------|--------------|-------------|
| Q6QAAQ1 | [8-28]    | LVVDNGSGMCKAGFAGDDAPR    | -0,181421816 | 0,056097874 |
| Q6QAAQ1 | [8-28]    | LVVDNGSGMCKAGFAGDDAPR    | 0,411900537  | 0,466744759 |
| Q6QAAQ1 | [8-28]    | LVVDNGSGMCKAGFAGDDAPR    | 0,155038842  | 0,083835037 |
| Q0MVN8  | [46-55]   | GVNPVDYIR                | 1,487266327  | 0,790126106 |
| Q9N0F1  | [122-145] | GVIEALLVPDGGKVEGGTPLFTLR | 0            | NaN         |
| D0VWV4  | [31-40]   | GTTAKEEMER               | 0,05948588   | 0,078356291 |
| Q08092  | [209-226] | GTNKGASQAGMTAPGTR        | 0,624482478  | 0,284367889 |
| Q08094  | [211-227] | GTNKCASQVGMTAPGTR        | -0,211143469 | 0,085842607 |
| P02067  | [84-105]  | GTFAKLSELHCDQLHVDPENFR   | 0            | NaN         |
| P02067  | [89-105]  | LSELHCDQLHVDPENFR        | 1,351990477  | 1,194033059 |
| Q7M329  | [185-200] | LEICEDGPVFYPPPKKE        | 0            | NaN         |
| P02067  | [32-41]   | LLVVYPWTQR               | 0,270619699  | 0,387443599 |
| P53590  | [39-47]   | LNLQEYQSK                | 0,245647418  | 0,416165973 |
| P50441  | [218-235] | MADELYDQDYPIYSVEDR       | 0            | NaN         |
| P02067  | [15-31]   | LWGKVVNDEVGGEALGR        | 0,765058137  | 0,218916072 |
| Q29307  | [25-34]   | FSSDTPEGVR               | -1,426061922 | 1,181604555 |
| P29700  | [286-304] | LVVGPMVVAVPPGIPPVHR      | -0,385578547 | 0,173153795 |
| P80021  | [47-58]   | GTAEVSSILEER             | -1,237020766 | 1,000068003 |
| P81405  | [1-19]    | GDVCQDCIQMVTDLQNAVR      | 0,109037345  | 0,203592684 |
| Q0MVN8  | [24-43]   | LQSDVAIPIPKDNQVLIKVH     | 0            | NaN         |
| P80021  | [408-416] | INVGLSVSR                | 1,128028831  | 0,922870695 |
| P05024  | [208-225] | GCKVDNSSLTGESEPQTR       | 1,911128713  | 0,592157005 |
| P81649  | [91-118]  | VNCHQSAKPVSLTQCSFTGGNYP  | 0            | NaN         |
| A5GFY8  | [450-460] | GAVFRPEVPLR              | 1,795384524  | 0,944026799 |
| P01965  | [19-31]   | GQAGAHGAEALER            | -0,487723572 | 0,184692022 |
| P81405  | [1-16]    | GDVCQDCIQMVTDLQN         | 0            | NaN         |
| P81405  | [1-19]    | GDVCQDCIQMVTDLQNAVR      | -0,638577734 | 0,342192493 |
| P81405  | [1-19]    | GDVCQDCIQMVTDLQNAVR      | -0,047380538 | 0,07442053  |
| O46427  | [114-123] | GPYPPSMDWR               | -0,005090034 | 0,006297742 |
| Q6QAAQ1 | [20-28]   | GFAGDDAPR                | 0,624493064  | 0,186239001 |
| P50390  | [21-41]   | GPAGAGESKCPLMVKVLDAVR    | 1,947766468  | 0,749950704 |
| P80021  | [192-204] | GKAVDSLPIGR              | 0,97634112   | 0,592686674 |
| Q5S3G4  | [35-49]   | GGVPTDEEQATGLER          | -0,439554005 | 0,136000407 |

|         |             |                         |              |             |
|---------|-------------|-------------------------|--------------|-------------|
| A1XQU5  | [2-17]      | GKFMKPGKVVLVLAGR        | 0,0657093    | 0,077940853 |
| P36968  | [74-89]     | GKTEVNYTQLVDLHAR        | 0            | NaN         |
| Q06AU5  | [7-24]      | GDPGQGAAAAAAAPETR       | -0,567507733 | 0,239876788 |
| P01965  | [15-31]     | GKVGGQAGAHGAEALER       | 0,056999113  | 0,02134336  |
| Q71LE2  | [103-117]   | GLFEDTNLCAIHAKR         | 0            | NaN         |
| P53590  | [39-56]     | LNLQEYQSKKLMSDNGVK      | -0,392001148 | 0,19260312  |
| P04366  | [8-24]      | LTLPNDIQVQENFDLSR       | 0,925109667  | 0,465321197 |
| Q6QAAQ1 | [13-28]     | GSGMCKAGFAGDDAPR        | 1,50253135   | 0,3849522   |
| Q4U116  | [417-438]   | 3DTPHDGGHGGGGHADCEELQF  | 0            | NaN         |
| O46427  | [293-317]   | PYWIVKNSWGPQWGMNGYFLI   | 0            | NaN         |
| Q52NJ4  | [2-8]       | GLLSILR                 | 0,070706755  | 0,127897744 |
| P04366  | [10-24]     | LPNDIQVQENFDLSR         | 0,321831103  | 0,183948325 |
| Q9TSX9  | [4-22]      | GLLLGDEAPNFEANTTIGR     | 0            | NaN         |
|         |             | GLLAQR                  | 0            | NaN         |
| Q5S3G4  | [34-49]     | GGGVPTDEEQATGLER        | 1,379101531  | 0,735524914 |
| Q95334  | [603-618]   | GNAFLKINPDHIGFYR        | 0,102660657  | 0,104244022 |
| P80928  | [82-87]     | GLLAER                  | 0,518461552  | 0,728989723 |
| P81405  | [1-9]       | GDVCQDCIQ               | 0            | NaN         |
| Q6QAAQ1 | [273-290]   | GIHETTFNSIMKCDVDIR      | 0,300752927  | 0,41690154  |
| C0HL13  | [1360-1382] | GGCTHLCIQGPFGAQCECPLGYR | 0            | NaN         |
| P01025  | [958-977]   | EEIPPADLSDQVPDTESETK    | 0            | NaN         |
| P26044  | [487-509]   | DEHDENNAEASAELSNDGVMNH  | 0            | NaN         |
| P18648  | [25-33]     | DDPQSPWDR               | 0,666335454  | 0,843858686 |
| P02067  | [1-31]      | SAEEKEAVLGLWGKVVNDEVGG  | 0            | NaN         |
| Q9MYT8  | [1-15]      | MVPPVQVSPLIKLGR         | 0,389651664  | 0,734959384 |
| P29700  | [291-304]   | MVVAVPPGIPPVHR          | -1,225965132 | 0,956237378 |
| P80928  | [1-12]      | MPMFVVNTNVPR            | 0,213763202  | 0,386579026 |
| P00889  | [27-47]     | SASSTNLKDILADLIPKEQAR   | -0,876622973 | 0,428490235 |
| P80031  | [1-11]      | PPYTITYFPVR             | 0,006891886  | 0,008722058 |
| Q6QAAQ1 | [44-62]     | MVGMGQKDSYVGDEAQSKR     | -0,193358187 | 0,100110251 |
| A1XQR6  | [2-18]      | PVAVGPYQSQPSCFDR        | 0,073450459  | 0,094505725 |
| P01965  | [81-92]     | SALSDLHAHKLR            | 0            | NaN         |
| P15145  | [827-840]   | SALACSNEVWLLNR          | 0            | NaN         |

|        |                |                           |              |             |
|--------|----------------|---------------------------|--------------|-------------|
| Q0QF01 | [44-75]        | DAISTQYPVVDHEFDVVVGAGC    | 0,362685835  | 0,598775516 |
| Q2XQV4 | [22-55]        | AVPAPNQQPEIFYNQIFINNEWI   | 0            | NaN         |
| Q8MJ14 | [7-17]         | SAAALAAVAPR               | 1,074226619  | 0,53207155  |
| P03974 | [625-638]      | RPDIIDPAILRPGR            | 0            | NaN         |
| O62839 | [434-444]      | SANEDNVTQVR               | 0            | NaN         |
| C0HL13 | [26-34]        | RECLGNEFR                 | -1,567645422 | 1,152672895 |
| Q2XVP4 | [203-214]      | MVDNEAIYDICR              | 0,225220727  | 0,081293391 |
| P80229 | [346-362]      | MPEEDFIADHPFIFIR          | 0            | NaN         |
| P02067 | [109-117]      | NVIVVVLAR                 | 1,503971015  | 0,514122544 |
| P00371 | [86-99]        | NMGLTPVSGYNLFR            | -0,913905543 | 0,589367494 |
| P62802 | [26-36]        | NIQGITKPAIR               | -0,88098661  | 0,429157585 |
| Q9MZ16 | [124-139]      | NLGCDVDFDIAGPSIR          | -0,744974644 | 0,355528689 |
| P13618 | [1-9]          | NKELDPVQK                 | -1,437009576 | 1,063561335 |
| P50441 | [70-82]        | NEWDPLEEVIVGR             | 0,34955946   | 0,151692037 |
| P63053 | [1-27]         | QIFVKTLTGKTITLEVEPSDTIENV | 0            | NaN         |
| Q04967 | [43-51];A5A8V7 | YVAFTDTER                 | 0            | NaN         |
| POC5I2 | [1-13]         | MKALILVGGYGTR             | 1,010658209  | 0,540218352 |
| Q8WN98 | [1-22]         | VKDPDPSQVYRPDMDPEAAKDK    | -0,204916369 | 0,082778472 |
| P47788 | [1-25]         | KPPAACAGDALDVAAPCSAVNYI   | 0            | NaN         |
| P04366 | [54-62]        | MLGEGATER                 | 1,406696801  | 0,723940154 |
| Q4U116 | [415-438]      | NGDTPHDGGHGGGGHADCEELC    | 0            | NaN         |
| Q9MYT8 | [3-15]         | PPVQVSPLIKLGR             | 0,125669373  | 0,139360808 |
| P62279 | [4-19]         | MHAPGKGLSQSALPYR          | 1,739613232  | 1,070323689 |
| P02554 | [100-121]      | NWAKGHYTEGAELVDSVLDVVR    | 0            | NaN         |
| P01846 | [87-105]       | QVTHEGTIVEKTVTPSECA       | 0            | NaN         |
| Q29221 | [240-259]      | QTAISENYQTMSDTTFKALR      | 0            | NaN         |
| O62839 | [395-424]      | QGGAPNYYPNSFSAPEQTHSALE   | 0            | NaN         |
| Q9GMB0 | [26-39]        | SPEALPLVNEDVKR            | 0,029704902  | 0,035021574 |
| O02713 | [52-61]        | SPGVAELSQR                | 0,353544591  | 0,402488376 |
| P01965 | [1-11]         | VLSAADKANVK               | 1,479817127  | 0,757670161 |
| P01965 | [1-11]         | VLSAADKANVK               | 1,333528932  | 0,656173529 |
| P50578 | [182-203]      | VLQVECHPYLAQNELIAHCQAR    | 1,323104049  | 0,700233804 |
| P41367 | [23-53]        | AVPQCEPGSGFSFELTEQQKEFQ   | -0,282288824 | 0,109586349 |

|        |           |                          |              |             |
|--------|-----------|--------------------------|--------------|-------------|
| Q28970 | [2-15]    | VILQQGDYVWMDLR           | 0            | NaN         |
| P00355 | [2-11]    | VKVGVNFGFR               | 0,064372652  | 0,08153638  |
| P00355 | [2-11]    | VKVGVNFGFR               | 0            | NaN         |
| P82460 | [2-21]    | VKQIESKYAFQEALNSAGEK     | -0,268541093 | 0,105250855 |
| Q06AT9 | [2-11]    | VKLFIGNLPR               | 0,184780839  | 0,278326347 |
| Q07717 | [85-100]  | VHTEFTPNAVDQYSCR         | 0            | NaN         |
| P02067 | [2-31]    | AEEKEAVLGLWGKVNVDVGGGE   | 0,616884536  | 0,184926105 |
| P00355 | [2-11]    | VKVGVNFGFR               | -0,153637374 | 0,140139551 |
| Q2XVP4 | [176-214] | EPYNSILTTHTTLEHSDCAFMVDN | 0            | NaN         |
| P41367 | [23-53]   | AVPQCEPGSGFSFELTEQQKEFQ  | 0,605274116  | 0,282547136 |
| P41367 | [23-46]   | HTKAVPQCEPGSGFSFELTEQQI  | 0            | NaN         |
| Q08094 | [257-266] | QSGQVFGLGR               | 0,193106652  | 0,623311606 |
| Q5S1U1 | [177-190] | QSAEITIPVTFEAR           | 0,443556302  | 1,210600941 |
| Q29095 | [29-40]   | QPNFQEDKFLGR             | -0,375224806 | 0,186234574 |
| P80021 | [44-58]   | QKTGTAEVSSILEER          | -0,095567541 | 0,081214272 |
| P05027 | [84-107]  | QKTEISFRPNDPQSYESYVVSIVR | 0            | NaN         |
| P50441 | [40-55]   | QAATASSGNSCAADDK         | 0            | NaN         |
| P41367 | [23-46]   | HTKAVPQCEPGSGFSFELTEQQI  | 0            | NaN         |
| P50441 | [40-55]   | QAATASSGNSCAADDK         | 0            | NaN         |
| P50441 | [40-62]   | QAATASSGNSCAADDKATDPLPK  | 0            | NaN         |
| A5PF10 | [386-398] | QAPQLYVLYEKGR            | -1,344329167 | 0,833701019 |
| O62839 | [395-424] | QGGAPNYYPNSFSAPEQTHSALE  | 0            | NaN         |
| Q29201 | [2-15]    | PSKGPLQSVQVFGR           | 0,072506977  | 0,0794089   |
| O62839 | [395-424] | QGGAPNYYPNSFSAPEQTHSALE  | 0            | NaN         |
| Q95334 | [65-79]   | QGVCPASEDESGNWR          | 0            | NaN         |
| P50441 | [40-62]   | QAATASSGNSCAADDKATDPLPK  | 1,932591806  | 1,262041165 |
| P02067 | [2-31]    | AEEKEAVLGLWGKVNVDVGGGE   | 1,38211395   | 0,634363689 |
| Q29594 | [2-13]    | PFSNSHNTLKLKLR           | 0,189076067  | 0,284605118 |
| Q9TSX9 | [2-22]    | PGGLLLGDEAPNFEANTTIGR    | 0,355338478  | 0,531275674 |
| Q29195 | [79-88]   | SCGKDGFBHR               | 0,6318771    | 0,270142831 |
| P09571 | [116-123] | SCHTGLGR                 | 1,209274121  | 0,533187128 |
| C0HL13 | [345-365] | SCVDFNDCQIWGICDHFCEDR    | 0            | NaN         |
| Q1W0Y2 | [17-25]   | SHYEEGPGK                | -1,543469531 | 1,103952404 |

|        |                  |                          |              |             |
|--------|------------------|--------------------------|--------------|-------------|
| F1RKQ4 | [40-48]          | SDLDSLKGR                | 1,325551337  | 0,515049046 |
| P63053 | [57-72]          | SDYNIQESTLHLVLR          | -0,104524951 | 0,093033078 |
| P50441 | [49-82]          | DKATDPLPKDCPVSSYNEWDPLE  | 1,755721254  | 0,609776937 |
| P42174 | [1-15]           | SEAAADREDDPNFFK          | -0,136622554 | 0,228942538 |
| Q95283 | [30-41]          | SEDYALPVYVDR             | 0,345073498  | 0,74255995  |
| Q9TV69 | [27-37]          | SEHQVVAVAAR              | 0,438336833  | 0,805502468 |
| Q4U116 | [1039-1066]      | KVPSIKIPMDIMEQQPFLSDSKPS | 1,571518387  | 0,73004684  |
| Q04967 | [434-449];A5A8V7 | SDNQPGVLIQVYEGER         | 0,355317912  | 0,192907616 |
| P80021 | [276-301]        | ATASDAAPLQYLAPYSGCSMGEYI | 0            | NaN         |
| Q1W0Y2 | [17-29]          | SHYEEGPGKNLPF            | -0,219805664 | 0,205408932 |
| Q8WNV7 | [258-278]        | SEDASYITGETVVVGGGTASR    | 0            | NaN         |
| Q1W0Y2 | [17-36]          | SHYEEGPGKNLPFSVENKWR     | 0,587727037  | 0,280337534 |
| C0HL13 | [4633-4647]      | SATEDTFKDTANLVR          | -0,518744337 | 0,210644334 |
| O62839 | [306-320]        | SEYPLIPVGKLVLR           | 0,294761784  | 0,306445994 |
| P80041 | [336-347]        | SHQGSGLITDYR             | 0,73460234   | 1,243753306 |
| P16276 | [35-44]          | SHFEPHEYIR               | 0,054625391  | 0,085695567 |
| P08835 | [310-318]        | SHCIAEAKR                | 1,064655398  | 0,45076872  |
| P26042 | [144-156]        | SGYLAGDKLLPQR            | 1,088154261  | 0,624342724 |
| Q9GJT2 | [65-86]          | SGYHQAASEHGLVVIAPDTSR    | 0            | NaN         |
| O19069 | [275-295]        | SGPKSKPVVSFIAGLTAPPGR    | 0,633393275  | 0,213542097 |
| P08835 | [29-34]          | SEIAHR                   | 2,029910901  | 0,994475991 |
| Q6QAQ1 | [300-312]        | SGGTTMYPGIADR            | 0,696597382  | 1,066315754 |
| O02705 | [675-688]        | SGFSLEDPQTHANR           | 0            | NaN         |
| Q1KYT0 | [373-400]        | ETEDTFIADLVVGLCTGQIKTGAP | 1,732724302  | 0,985534498 |
| C0HL13 | [4478-4499]      | SGEDVNMDIGVSGFGPESADR    | 0            | NaN         |
| P80021 | [292-301]        | SGCSMGEYFR               | -0,064520699 | 0,07758887  |
| Q3ZD69 | [12-25]          | SGAQASSTPLSPTR           | 0            | NaN         |
| Q29548 | [25-44]          | SGAESLGLWPLPFAVDISPR     | 4,471092088  | 1,034070988 |
| Q5S3G4 | [33-49]          | SGGGVPTDEEQATGLER        | 0,161961121  | 0,258735945 |
| Q29594 | [2-13]           | PFSNSHNTLKL              | 1,53879945   | 0,938221076 |
| P05024 | [226-238]        | SPDFTNENPLETR            | 1,030282378  | 0,644587494 |
| P00348 | [146-162]        | SNTSSLQITSLANATTR        | 0,030666879  | 0,010807289 |
| P02554 | [138-156]        | SLGGGTGSGMGTLISKIR       | 1,132456032  | 0,71973651  |

|        |             |                          |              |             |
|--------|-------------|--------------------------|--------------|-------------|
| Q9N1F5 | [8-25]      | SLGKGSAPPGVPPEGLIR       | -0,346538062 | 0,128316197 |
| O02772 | [23-31]     | SIGVGFATR                | 0,07498618   | 0,082674872 |
| C0HL13 | [2398-2430] | DPEDYNVPFTAISVEETAVAVDYD | 0            | NaN         |
| C0HL13 | [2398-2430] | DPEDYNVPFTAISVEETAVAVDYD | 0            | NaN         |
| P08835 | [89-105]    | SIHTLFGDKLCAIPSLR        | 1,223370136  | 0,579206263 |
| Q3ZD69 | [51-60]     | SLETENAGLR               | 0,973332261  | 0,413125428 |
| Q29036 | [2-11]      | SASVLSVISR               | 0,105428683  | 0,191025798 |
| P80928 | [2-12]      | PMFVVNTNVPR              | 0,856051391  | 0,478663437 |
| P80928 | [2-12]      | PMFVVNTNVPR              | 0,533244027  | 0,244364486 |
| P29700 | [17-25]     | PHGPILGYR                | 0,022839404  | 0,007021106 |
| Q29308 | [2-16]      | PGVTVKDVNQQEFVR          | 0,538510429  | 0,402135371 |
| P81045 | [1-22]      | PGLAAAIAPPESQEKPLKPC     | -1,088915963 | 0,812033825 |
| P81045 | [1-16]      | PGLAAAIAPPESQEK          | 0,005025598  | 0,001980699 |
| O62839 | [410-424]   | SAPEQTHSALEHCTR          | 0            | NaN         |
| C0HL13 | [2335-2362] | AEVNYNPCLQNNGGCTHFCFALP  | 0            | NaN         |
| Q1W0Y2 | [17-34]     | SHYEEGPGKNLPFSVENK       | -0,186630798 | 0,093020945 |
| B1PK17 | [169-188]   | SIKYPVGIEVGPPQPGVLR      | 0,016695661  | 0,007157651 |
| Q3ZD69 | [282-296]   | SNLVGAAHEELQQSR          | 0            | NaN         |
| Q6ITQ4 | [92-108]    | SNEHENAYENTSEEEGR        | 0            | NaN         |
| Q0QF01 | [346-352]   | SMTLEIR                  | -1,526648507 | 1,249709526 |
| C0HL13 | [4036-4044] | SMSEHYGER                | -0,142980796 | 0,24950464  |
| P02543 | [51-64]     | SLYTSSPGGVYATR           | 0,961031237  | 0,762316371 |
| P50828 | [27-39]     | SLTAGPKHGAEGR            | -0,245396123 | 0,303253753 |
| P67937 | [6-12]      | SLEAVKR                  | -0,349956211 | 0,453888165 |
| P50828 | [132-152]   | SLQEEFPGVPSPLDAAVECHR    | 0            | NaN         |
| Q2XVP4 | [187-214]   | LTHTTLEHSDCAFMVDNEAIYDI  | 0            | NaN         |
| Q2XVP4 | [187-214]   | LTHTTLEHSDCAFMVDNEAIYDI  | 0            | NaN         |
| A5GZW8 | [59-70]     | SKAASLHWTGER             | 1,424392502  | 0,835008007 |
| P80147 | [230-250]   | SKAIHKIDIPSFWDWPIAPFPR   | 0            | NaN         |
| O19069 | [279-295]   | SKPVVSFIAGLTAPPGR        | 0            | NaN         |
| P02543 | [87-100]    | SLADAINTEFKNTR           | 1,155999697  | 0,725498691 |
| Q2EN81 | [77-85]     | SIMNPYVKR                | 0,210202236  | 0,489636898 |
| P00355 | [4-11]      | VGVNGFGR                 | 1,657157668  | 0,957579656 |

|         |             |                         |              |             |
|---------|-------------|-------------------------|--------------|-------------|
| A1XQR6  | [5-18]      | VGPYQQSQPSCFDR          | -0,278535726 | 0,133824426 |
| P01965  | [17-31]     | VGGQAGAHGAEALER         | -0,6588742   | 0,318902685 |
| P00371  | [87-99]     | MGLTPVSGYNLFR           | 1,245533867  | 0,630682944 |
| P62895  | [29-39]     | TGPNLHGLFGR             | 0,057676302  | 0,059047839 |
| O62839  | [445-456]   | TFYLNVLNEEER            | 0            | NaN         |
| P79263  | [695-707]   | SVPDETSHDMDSR           | 0            | NaN         |
| P01025  | [670-677]   | SVQLMEKR                | 0,470688544  | 0,418413899 |
| P00506  | [31-53]     | WVAHVEMGPPDPILGVTEAFKI  | 0            | NaN         |
| P79273  | [27-42]     | TIFQSVELPETYQMLR        | 0            | NaN         |
| Q8MIR4  | [394-422]   | PGGPAYQPVVEAFGTDILHKDGT | 0            | NaN         |
| P80928  | [75-87]     | SYSKLLCGLLAER           | 1,219516483  | 0,614385859 |
| Q0QF01  | [196-207]   | TGHSLHTLYGR             | 0            | NaN         |
| Q6QAAQ1 | [52-62]     | SYVGDEAQSKR             | 0,286747232  | 0,078146523 |
| P50828  | [29-39]     | TAGPKHGAEGR             | 1,598821148  | 0,866267534 |
| P08835  | [76-105]    | ADESAENCDSIHTLFGDKLCAIP | 0            | NaN         |
| C0HL13  | [680-688]   | TDNGGLGYR               | 0,134518298  | 0,18658901  |
| Q6QAAQ1 | [239-254]   | SYELPDGQVITIGNER        | 0,132426262  | 0,192387002 |
| Q6QAAQ1 | [106-116]   | TEAPLNPKANR             | 0,33203709   | 0,308091917 |
| C0HL13  | [3192-3203] | TNIEPYLIFS NR           | -0,179905121 | 0,054001494 |
| P02543  | [101-113]   | TNEKVELQELNDR           | -0,514766642 | 0,238209227 |
| P05024  | [214-225]   | SSLTGESEPQTR            | 0,912837676  | 0,489181704 |
| P00258  | [59-72]     | SSSEDKITVHFINR          | 0,974877634  | 0,352476272 |
| P09571  | [259-280]   | SVDGQEDSIWELLNQAQEHFGR  | 0            | NaN         |
| Q29318  | [40-55]     | SVGICGSDVHYWQHGR        | 0            | NaN         |
| P33198  | [301-322]   | SVLVCPDGKTIEAAAHGTVTR   | 0            | NaN         |
| P41367  | [25-53]     | VPQCEPGSGFSFELTEQQKEFQA | -0,115129084 | 0,047031976 |
| C0HL13  | [4590-4605] | TNFENPIYAETENEPK        | 0            | NaN         |
| P08835  | [435-451]   | TKKVPQVSTPTLVEVAR       | 1,068632846  | 1,009047835 |
| Q9TV61  | [1377-1386] | TKYETDAIQR              | 0,646499979  | 0,239913786 |
| P33198  | [310-322]   | TIEAAAHGTVTR            | 0            | NaN         |
| P08835  | [92-105]    | TLFGDKLCAIPSLR          | 1,337492142  | 0,552622933 |
| P04366  | [9-24]      | TLPNDIQVQENFDLSR        | -1,124690498 | 0,29617364  |
| P80031  | [4-11]      | TITYFPVR                | 2,688958683  | 1,190794214 |

|        |             |                         |              |             |
|--------|-------------|-------------------------|--------------|-------------|
| Q29099 | [109-122]   | TMVNYTSTVTPVLR          | 0            | NaN         |
| Q29261 | [2-23]      | TKLNAQVKGSLNVTPGVQIWR   | 0,070294601  | 0,069470308 |
| A5GZW8 | [58-70]     | SSKAASLHWTGER           | 1,284535126  | 0,883849045 |
| Q70BM6 | [2-9]       | TFAELVDR                | -0,019469836 | 0,025142829 |
| P80928 | [3-12]      | MFVVNTNVPR              | -1,168368342 | 0,87384394  |
| Q9N0F1 | [69-89]     | DDVITVKTPAFAESVTEGDVR   | 0,233149445  | 0,354665786 |
| P24854 | [23-38]     | DEAIHCPPCSEEKLAR        | 0,434695766  | 0,524909661 |
| Q9TSX9 | [9-22]      | DEAPNFEANTTIGR          | 0,39588743   | 0,609352699 |
| Q2XVP4 | [294-308]   | ACFEPANQMVKCDPR         | 1,138733472  | 0,697058377 |
| P26044 | [490-509]   | DENNAEASAELSNDGVMNHR    | 0            | NaN         |
| Q6QAQ1 | [4-28]      | AALVVDNGSGMCKAGFAGDDAI  | -0,375989704 | 0,180592678 |
| P50441 | [224-235]   | DQDYPIYSVEDR            | 0            | NaN         |
| Q29092 | [22-37]     | EDEVVDVGTVEEDLGK        | 0,26242144   | 0,792299519 |
| C0HL13 | [4485-4499] | DIGVSGFGPESAI DR        | 0,366812391  | 0,109661522 |
| P04366 | [13-24]     | DIQVQENFDLSR            | 0,402504093  | 0,120184327 |
| P18648 | [71-84]     | DNWDSL GSTFTKVR         | 0,861802887  | 0,233889487 |
| P01025 | [23-35]     | DPIYTIITPNVLR           | 2,149033161  | 0,87706138  |
| B3SP85 | [54-72]     | DPPPVN VNLYYESLCNGCR    | 2,019591306  | 0,686011957 |
| A1XQS5 | [62-99]     | FIGAGAATVGVAGSGAGIGTVFG | 0            | NaN         |
| A1XQS5 | [62-68]     | DIDTAAK                 | 0,386889053  | 0,670341239 |
| Q95312 | [41-56]     | TFASPTQVFFNGANVR        | 1,140911834  | 0,652469107 |
| P48819 | [20-27]     | DQESCKGR                | 0,895116066  | 0,323697777 |
| P02067 | [95-105]    | DQLHVDPENFR             | 0,566516721  | 0,650314382 |
| P16276 | [634-648]   | NAV TQEFGVPD TAR        | 0            | NaN         |
| Q5S3G4 | [31-49]     | MASGGGVPTDEEQATGLER     | 0,811962411  | 0,768907053 |
| P80021 | [335-345]   | EAYPGDV FYLH            | 0            | NaN         |
| I3LMB3 | [21-37]     | EAPQEHD PFTYDYQSLR      | 1,185226715  | 0,605897793 |
| Q6QAQ1 | [107-116]   | EAPLNPKANR              | 1,949931043  | 0,957048588 |
| Q9MZ16 | [128-139]   | DVDFDIAGPSIR            | 1,397622611  | 1,18800088  |
| P22412 | [17-25]     | DQFRDLAVR               | -0,303191785 | 0,406585147 |
| P81405 | [2-19]      | DVCQDCIQMVTDLQNAVR      | 1,295192819  | 1,111901149 |
| P08835 | [25-34]     | DTYKSEIAHR              | 0,595173144  | 0,770956451 |
| P08835 | [25-34]     | DTYKSEIAHR              | 0            | NaN         |



|         |                  |                          |              |             |
|---------|------------------|--------------------------|--------------|-------------|
| Q8HZK3  | [1332-1339]      | DTLSLHIR                 | 0            | NaN         |
| Q9TV61  | [1202-1216]      | DSVAELGEQIDNLQR          | 0            | NaN         |
| P80021  | [197-204]        | DSLVPIGR                 | 0,921777163  | 0,468071288 |
| P06867  | [20-38]          | DSLDDYVNTQGAFSLSR        | 0            | NaN         |
| P81405  | [2-19]           | DVCQDCIQMVTDLQNAVR       | 0            | NaN         |
| Q3ZD69  | [428-435]        | SSFSQHAR                 | 0            | NaN         |
| Q0QF01  | [43-75]          | SDAISTQYPVVDHEFDVVGAG    | 0,020642749  | 0,022514419 |
| F1RKQ4  | [9-35]           | AGCADDALAGLVACNPSLQLQ    | 0            | NaN         |
| Q71LE2  | [42-50]          | YRPGTVALR                | -0,002016438 | 0,002325959 |
| Q2XVP4  | [357-373]        | YQPPTVVPGGDLAKVQR        | 0,697604976  | 0,345391984 |
| Q29545  | [261-273];P09571 | YLAQVPSHAVVAR            | 0,845517372  | 0,344460339 |
| C0HL13  | [4551-4584]      | VPDELAPDTKPASPSADETQVTK  | 0            | NaN         |
| Q6QAAQ1 | [240-254]        | YELPDGQVITIGNER          | -0,188106733 | 0,084620914 |
| P06348  | [74-82]          | YDVEKNNSR                | 0,329874295  | 0,501326971 |
| C0HL13  | [4632-4647]      | YSATEDTFKDTANLVR         | -1,144649389 | 0,460170217 |
| C0HL13  | [85-102]         | WVCDGEEDCSNGADEHQR       | 0            | NaN         |
| P01965  | [14-31]          | WGKVGQAGAHGAEALER        | -1,013244767 | 0,488007588 |
| P18648  | [95-106]         | WDNLEKETEALR             | 1,203211021  | 0,626033883 |
| P02554  | [101-121]        | WAKGHYTEGAELVDSVLDVVR    | -0,428044111 | 0,221779706 |
| Q29318  | [12-20]          | VVHGPGDLR                | 0            | NaN         |
| A1E295  | [129-141]        | VNVEVSAEDMLTC            | 0            | NaN         |
| P29700  | [16-25]          | VPHGPILGYR               | 0,473919428  | 1,110039413 |
| P18648  | [22-33]          | WQQDDPQSPWDR             | 0,233149805  | 0,283383388 |
| Q9MYT8  | [2-15]           | VPPVQVSPLIKLGR           | -0,020079791 | 0,019812841 |
| Q4U116  | [407-438]        | IVQMNGDTPHDGGHGGGGHAD    | 0            | NaN         |
| P62936  | [2-19]           | VNPTVFFDIAVDGEPLGR       | 0,049986716  | 0,073971458 |
| P02543  | [54-64]          | TSSPGGVYATR              | -0,104237094 | 0,101301063 |
| Q6QAAQ1 | [148-173]        | FGIVMDSGDGVTHTVPIYEGYALF | 0            | NaN         |
| A1XQU1  | [44-62]          | TTIAGVVYKDGIVLGADTR      | 0,008792348  | 0,00901662  |
| Q29554  | [111-125]        | TTSQEVTVQISQEAQR         | 0            | NaN         |
| Q6QAAQ1 | [297-312]        | TVLSGGTTMYPGIADR         | 0,224911792  | 0,054216954 |
| Q6Q2J0  | [269-291]        | VISAIPPTLTAKIHFRPELPSE   | 0            | NaN         |
| Q95332  | [89-108]         | YVAEKISGQKVNEAACDIAR     | 1,408503337  | 0,677534942 |

|         |           |                          |              |             |
|---------|-----------|--------------------------|--------------|-------------|
| Q6QAAQ1 | [297-312] | TVLSGGTTMYPGIADR         | 0            | NaN         |
| P08835  | [26-34]   | TYKSEIAHR                | 0,496316105  | 0,76910174  |
| P05024  | [211-225] | VDNSSLTGESEPQTR          | 0            | NaN         |
| P62802  | [61-68]   | VFLENVIR                 | 1,428934817  | 0,808171588 |
| A5A8V7  | [22-38]   | VFQHGKVEIANDQGNR         | -0,586075968 | 0,335044899 |
| P02543  | [5-12]    | TVSSSSYR                 | -0,312296432 | 0,142822703 |
| Q28943  | [4-21]    | VLSKDVADIESILALNPR       | 0,872896015  | 0,429074577 |
| P01965  | [41-50]   | TYFPHFNLSH               | 0            | NaN         |
| P04366  | [16-24]   | VQENFDLSR                | 1,113468813  | 0,427429204 |
| Q4U116  | [413-438] | VNGDTPHDGGHGGGGHADCEE    | 0            | NaN         |
| Q4U116  | [413-438] | VNGDTPHDGGHGGGGHADCEE    | 0            | NaN         |
| Q02038  | [38-45]   | SSYTVDGR                 | 0,001667022  | 0,00230767  |
| P00506  | [30-53]   | SWWAHVEMGPPDPILGVTEAFK   | 0,05542099   | 0,057897181 |
| P00506  | [30-53]   | SWWAHVEMGPPDPILGVTEAFK   | 0            | NaN         |
| P00506  | [30-52]   | SWWAHVEMGPPDPILGVTEAFI   | 0            | NaN         |
| P24964  | [64-71]   | SSVTHICR                 | 1,0090688    | 0,429153217 |
| C0HL13  | [641-655] | SSTRPFGVTYHAIR           | 1,29855801   | 0,83307521  |
| Q8SQ26  | [7-22]    | STADGVAVVGSGLIGR         | -0,295474035 | 0,123421487 |
| Q6QAAQ1 | [232-254] | SSSSLEKSYELPDGQVITIGNER  | 1,439583813  | 0,880251079 |
| P01846  | [80-105]  | SSGFTCQVTHEGTIVEKTVTPSEC | 0            | NaN         |
| P80147  | [29-54]   | IAAAKVDVEFDYDGPLMKTEVPG  | -0,128410493 | 0,101601811 |
| P10173  | [2-7]     | SQDSFR                   | -0,213080367 | 0,371493548 |
| P16276  | [412-424] | SQFTITPGSEQIR            | 0,234225889  | 0,637318065 |
| P50441  | [270-282] | SQVTNYMGIEWMR            | -0,139291997 | 0,144542192 |
| P15145  | [573-599] | AFDYLWIVPISSIKNGVMQDHYW  | 0            | NaN         |
| Q6QAAQ1 | [233-254] | SSSLEKSYELPDGQVITIGNER   | 1,353375335  | 0,770122445 |
| P50441  | [38-55]   | STQAATASSGNSCAADDK       | 0            | NaN         |
| P50441  | [38-55]   | STQAATASSGNSCAADDK       | 0            | NaN         |
| P50441  | [38-62]   | TQAATASSGNSCAADDKATDPLP  | 0,009214393  | 0,00631094  |
| P04366  | [7-24]    | VLTLPNDIQVQENFDLSR       | -0,045300932 | 0,020549182 |
| P00377  | [1-28]    | LNCIVAVSQNMGIGKNGDLPWP   | -0,16566569  | 0,072146932 |
| Q0QF01  | [47-75]   | AISTQYPVVDHEFDAVVVGAGGA  | 0            | NaN         |
| P02067  | [134-147] | VVAGVANALAHKYH           | 0            | NaN         |

|        |           |                          |              |             |
|--------|-----------|--------------------------|--------------|-------------|
| P29700 | [292-304] | VVAVPPGIPPVHR            | 0,067554941  | 0,057929969 |
| Q6QAA1 | [9-28]    | VVDNGSGMCKAGFAGDDAPR     | 0,02755706   | 0,008801893 |
| P20305 | [43-62]   | VVEHPEFLKAGKEPGLQIWR     | -0,088471273 | 0,033100583 |
| P29700 | [287-304] | VVGPMVVAVPPGIPPVHR       | 0,081520155  | 0,027254232 |
| Q2EN81 | [28-40]   | VRPPVQIYGIEGR            | 1,671001185  | 1,043316983 |
| P16276 | [637-648] | TQEGPVPDAR               | 0,160359729  | 0,061814085 |
| P00346 | [213-229] | TPKVDFPQDQLSTLTGR        | -0,329794139 | 0,158679856 |
| Q29261 | [757-788] | SGPLPIFPLEQLVNKPAEELPQGV | 0            | NaN         |
| Q52NJ6 | [97-110]  | STYNHLSSWLTAR            | 1,486655094  | 0,89868551  |
| Q767M3 | [29-41]   | STQSEPHGSPISR            | 0            | NaN         |
| P50441 | [38-62]   | TQAATASSGNSCAADDKATDPLP  | -1,106528286 | 0,845438882 |
| Q29092 | [22-39]   | EDEVVDVGTVEEDLGKSR       | 0,245658024  | 0,285635697 |
| P06348 | [70-82]   | AAAGYDVEKNNSR            | 1,210563575  | 0,686641271 |

The difference indicates doxycycline vs. control group. Proteins were considered significant if  $-\log_{10}(\text{p-value}) > 1.3$ . Significant p-values are marked bold.

Abbreviations: N/A = not available
