# Supplementary material for: Doxycycline Alters the Porcine Renal Proteome and Degradome during Hypothermic Machine Perfusion
Source: MDPI journal article supplement (doi:10.3390/cimb44020039), 2022-01-23
Supplement: s1 [file s1]

**Table S2.** Identified degradation products pre-reperfusion (T-10).

| Accession number | Position in protein | Protein substrate              | Difference (DOXY vs Control) | -Log10 (P-value)   |
|------------------|---------------------|--------------------------------|------------------------------|--------------------|
| P06348           | [70-82]             | [L].AAAGYDVEKNNSR.[I]          | -1,560712537                 | <b>2,642160809</b> |
| P00348           | [149-162]           | [T].SSLQITSLANATTR.[Q]         | -1,398005133                 | <b>1,322692263</b> |
| P05024           | [214-225]           | [N].SSLTGESEPQTR.[S]           | -1,577358017                 | <b>1,493041642</b> |
| Q9TV61           | [1377-1386]         | [R].TKYETDAIQR.[T]             | -1,808785508                 | <b>2,079208174</b> |
| P80928           | [75-87]             | [R].SYSKLLCGLLAER.[L]          | -1,646971748                 | <b>2,727235283</b> |
| Q6QAAQ1          | [107-116]           | [T].EAPLNPKANR.[E]             | -1,301246082                 | <b>1,376620246</b> |
| Q2F7Z7           | [36-50]             | [A].EAFDSVLGDTASCHR.[A]        | -1,920492316                 | <b>1,97677672</b>  |
| Q6QAAQ1          | [234-254]           | [S].SSLEKSYELPDGQVITIGNER.[F]  | -1,681310138                 | <b>2,054281461</b> |
| Q2XVP4           | [294-308]           | [N].ACFEPANQMVKCDPR.[H]        | -1,755089222                 | <b>2,551668156</b> |
| P18648           | [71-84]             | [L].DNWDSLSTFTKVR.[E]          | -0,7430647                   | <b>1,418277225</b> |
| P18648           | [25-33]             | [Q].DDPQSPWDR.[V]              | -0,637013122                 | <b>1,712241382</b> |
| P15145           | [895-904]           | [S].FSNLIQGVTR.[R]             | -0,454979621                 | <b>1,518352732</b> |
| P04366           | [30-43]             | [W].FHVAVGSTCPWLKR.[F]         | -1,751182336                 | <b>3,059128915</b> |
| P37111           | [7-17]              | [R].EGEHPSVTLFR.[Q]            | -1,320619237                 | <b>2,120694398</b> |
| P50447           | [25-39]             | [A].EGLQGHAVQETDVPR.[H]        | -0,598837162                 | <b>1,570881288</b> |
| P62802           | [25-36]             | [R].DNIQGITKPAIR.[R]           | -1,713573394                 | <b>1,87822717</b>  |
| A5GZW8           | [58-70]             | [A].SSKAASLHWTGER.[V]          | -1,284526976                 | <b>3,083745477</b> |
| Q6QAAQ1          | [233-254]           | [S].SSSLEKSYELPDGQVITIGNER.[F] | -1,013515505                 | <b>3,998571991</b> |
| P80021           | [254-262]           | [R].STVAQLVKR.[L]              | -1,913475764                 | <b>1,656967207</b> |
| P0C5I2           | [1-13]              | [-].MKALILVGGYGTR.[L]          | -1,105147125                 | <b>2,314790876</b> |
| P04366           | [54-62]             | [L].MLGEGATER.[E]              | -1,610659743                 | <b>2,737384354</b> |
| Q8MJ14           | [7-17]              | [R].SAAALAAVAPR.[S]            | -1,582820436                 | <b>4,082786496</b> |
| P20305           | [426-441]           | [A].QHGMDDDG TGQKQIWR.[I]      | -2,206027187                 | <b>1,574229013</b> |
| Q9GMB0           | [26-39]             | [A].SPEALPLVNEDVKR.[T]         | -2,065934038                 | <b>2,481854133</b> |
| P50578           | [182-203]           | [A].VLQVECHPYLAQNELIAHCQAR.[G] | -2,219071925                 | <b>1,881590613</b> |
| P82460           | [2-21]              | [M].VKQIESKYAFQEALNSAGEK.[L]   | -1,890162164                 | <b>1,698424314</b> |
| P02067           | [2-31]              | .VHLSAEEKEAVLGLWGKVNVDVGGGALGI | -1,886984597                 | <b>1,957582928</b> |
| P02067           | [2-9]               | [M].VHLSAEEK.[E]               | -5,766934892                 | <b>2,204048969</b> |
| P62802           | [61-68]             | [K].VFLENVIR.[D]               | -2,09166705                  | <b>3,506601567</b> |
| Q95332           | [89-108]            | [N].YVAEKISGQKVNEAACDIAR.[Q]   | -1,715075359                 | <b>1,364463643</b> |
| Q2XVP4           | [357-373]           | [N].YQPPTVPPGGDLAKVQR.[A]      | -1,654333004                 | <b>1,924184518</b> |

|         |           |                                  |              |                    |
|---------|-----------|----------------------------------|--------------|--------------------|
| P18648  | [95-106]  | [F].WDNLEKETEAR.[Q]              | -1,636753009 | <b>3,587379254</b> |
| P80928  | [5-12]    | [F].VVNTNVPR.[A]                 | -2,070667709 | <b>1,616961306</b> |
| Q2EN81  | [28-40]   | [L].VRPPVQIYGIEGR.[Y]            | -1,00018773  | <b>1,308624724</b> |
| Q7M329  | [159-173] | [G].EKVQTLGQIELCLTR.[D]          | -1,484968709 | <b>2,266661772</b> |
| P62279  | [4-19]    | [R].MHAPGKGLSQSALPYR.[R]         | -0,687083237 | <b>1,374127387</b> |
| P27917  | [24-41]   | [A].EDTSLDKMQDYVKQATR.[T]        | -1,425681906 | <b>4,186750763</b> |
| A1Z623  | [31-39]   | [G].AEFSSESCR.[E]                | -0,511712297 | <b>2,315988186</b> |
| P62936  | [9-19]    | [F].DIAVDGEPLGR.[V]              | -2,276119512 | <b>2,01552347</b>  |
| P62279  | [5-19]    | [M].HAPGKGLSQSALPYR.[R]          | -2,115887534 | <b>2,640367457</b> |
| P01965  | [1-11]    | [-].VLSAADKANVK.[A]              | -6,795758506 | <b>2,364612218</b> |
| P08835  | [25-33]   | [R].DTYKSEIAH.[R]                | -0,859031528 | <b>3,278138146</b> |
| O02705  | [603-613] | [T].STYGWTANMER.[I]              | -2,318037288 | <b>1,869960544</b> |
| P01965  | [1-9]     | [-].VLSAADKAN.[V]                | -1,893344091 | <b>2,367616504</b> |
| P01965  | [1-8]     | [-].VLSAADKA.[N]                 | -1,607125107 | <b>1,418865535</b> |
| O02668  | [68-73]   | [Q].STITSR.[M]                   | -0,68544556  | <b>1,789051215</b> |
| P02067  | [35-41]   | [V].VYPWTQR.[F]                  | -1,808248777 | <b>1,83524517</b>  |
| P01965  | [1-9]     | [-].VLSAADKAN.[V]                | -1,358970705 | <b>1,524330774</b> |
| P53590  | [258-270] | [F].DAKINFDDNAEFR.[Q]            | -1,825243677 | <b>1,848371868</b> |
| Q2QLE2  | [2-21]    | [M].GLETEKADVQLFMDDDSYSR.[H]     | -1,982213724 | <b>1,872442685</b> |
| P26044  | [2-8]     | [M].PKPINVR.[V]                  | -1,687644653 | <b>4,202367639</b> |
| Q95339  | [4-10]    | [S].VVPLKDR.[R]                  | -2,336481591 | <b>2,225997676</b> |
| Q66RM2  | [1-6]     | [-].MNIFDR.[K]                   | -1,806803008 | <b>2,628088355</b> |
| A5GFY8  | [450-460] | [N].GAVFRPEVPLR.[R]              | -1,805934552 | <b>2,381828361</b> |
| P50390  | [21-41]   | [A].GPAGAGESKCPLMVKVLDVAVR.[G]   | -2,246241083 | <b>1,32205534</b>  |
| Q5S3G4  | [34-49]   | [S].GGGVPTDEEQATGLER.[E]         | -0,598022607 | <b>1,603229132</b> |
| P00346  | [66-74]   | [A].ADLSHIETR.[A]                | -1,727201056 | <b>2,858683941</b> |
| P00503  | [2-32]    | .APPSVFAEVPQAQPVLVFKLIADFREDPDPF | -2,3434537   | <b>2,22999992</b>  |
| Q6QAAQ1 | [29-37]   | [R].AVFPSIVGR.[P]                | -1,767902708 | <b>3,399500309</b> |
| P00889  | [28-47]   | [S].ASSTNLKDILADLIPKEQAR.[I]     | -1,457976823 | <b>2,485301773</b> |
| Q95332  | [2-8]     | [M].APVGDKK.[A]                  | -1,491582838 | <b>1,473847376</b> |
| P51779  | [27-36]   | [R].ILGGQEAKSH.[E]               | -1,871449127 | <b>2,108764982</b> |
| Q71LE2  | [104-117] | [G].LFEDTNLCAIHAKR.[V]           | -1,387377992 | <b>3,150351999</b> |
| Q8MJ39  | [26-37]   | [S].LESYEINPFLNR.[R]             | -1,625360524 | <b>1,740604189</b> |

|        |             |                                    |              |                    |
|--------|-------------|------------------------------------|--------------|--------------------|
| P06348 | [69-82]     | [A].LAAAGYDVEKNNSR.[I]             | -1,484843774 | <b>3,673825235</b> |
| Q0MVN8 | [46-55]     | [C].GVNPVDYIR.[S]                  | -1,807200983 | <b>2,844656211</b> |
| P28491 | [21-36]     | [T].IYFKEQFLDGDGWTDR.[W]           | -1,909791018 | <b>1,495952955</b> |
| Q2EN81 | [27-40]     | [K].LVRPPVQIYGIEGR.[Y]             | -0,555152563 | <b>1,402952121</b> |
| P02554 | [65-77]     | [I].LVDLEPGTMDSVR.[S]              | -1,469864128 | <b>2,593175747</b> |
| Q9N0F1 | [196-222]   | P].LTSKPVS AVKPTAAPPVAEPGAVKGLR.[A | -1,31833589  | <b>3,239650676</b> |
| O19069 | [143-154]   | [C].ITEGIPQQDMVR.[V]               | -1,826735292 | <b>1,776059263</b> |
| P00346 | [25-52]     | N].AKVAVLGASGGIGQPLSLLKNSPLVSR.[I  | -1,490727906 | <b>2,889418975</b> |
| Q29594 | [2-13]      | [M].PFSNSHNTLKLK.[F]               | -1,694641679 | <b>3,849926512</b> |
| Q71LE2 | [19-27]     | [R].KQLATKAAR.[K]                  | -2,001451055 | <b>1,70078633</b>  |
| P42174 | [1-15]      | [-].SEAAADREDDPNFFK.[M]            | -0,819222415 | <b>2,184775123</b> |
| Q29548 | [25-44]     | [T].SGAESLGLWPLPFAVDISPR.[S]       | -4,343631479 | <b>1,854076581</b> |
| P08059 | [107-124]   | [R].SNTPIVDGKDVMPEVNR.[V]          | -2,052831624 | <b>2,754362612</b> |
| P80928 | [2-12]      | [M].PMFVVNTNVPR.[A]                | -1,335861833 | <b>2,580905544</b> |
| A5GZW8 | [59-70]     | [S].SKAASLHWTGER.[V]               | -1,370989637 | <b>2,443379217</b> |
| Q0QF01 | [199-207]   | [H].SLLHTLYGR.[S]                  | -1,899500207 | <b>1,706593802</b> |
| Q9MZ15 | [278-294]   | [K].SINAGGHKLGLALELEA.[-]          | -2,088228452 | <b>2,307979309</b> |
| P05024 | [226-238]   | [R].SPDFTNENPLETR.[N]              | -1,420108311 | <b>2,702770471</b> |
| P02554 | [138-156]   | [H].SLGGGTGSGMGTLLISKIR.[E]        | -1,462349517 | <b>2,740221126</b> |
| P16276 | [35-44]     | [M].SHFEPHEYIR.[Y]                 | -0,434934418 | <b>1,728515867</b> |
| P50441 | [400-413]   | [N].SLGGGFHCWTCDVR.[R]             | -2,048751049 | <b>1,786179893</b> |
| P01025 | [747-762]   | [R].SDLDEEIIPEEDIISR.[S]           | -2,295719484 | <b>1,378300414</b> |
| Q0QF01 | [346-352]   | [R].SMTLEIR.[E]                    | 1,698009957  | <b>1,314408669</b> |
| Q6PQZ1 | [237-243]   | [R].SSDLTDR.[V]                    | 1,310458711  | <b>1,354905389</b> |
| P29700 | [291-304]   | [P].MVVAVPPGIPPVHR.[S]             | 1,402346692  | <b>1,430173616</b> |
| Q5S1U1 | [29-38]     | [R].LFDQAFGLPR.[L]                 | 1,700905673  | <b>1,488847957</b> |
| Q6QAQ1 | [89-95]     | [H].TFYNELR.[V]                    | 1,923208321  | <b>1,997840646</b> |
| P80021 | [47-58]     | [T].GTAEVSSILEER.[I]               | 1,428428321  | <b>1,598018619</b> |
| C0HL13 | [4632-4647] | [A].YSATEDTFKDTANLVR.[E]           | 1,547439336  | <b>1,326061949</b> |
| Q29307 | [25-34]     | [G].FSSDTPEGVR.[S]                 | 1,567004002  | <b>1,510279772</b> |
| C0HL13 | [26-34]     | [G].RECLGNEFR.[C]                  | 1,436112459  | <b>1,368614695</b> |
| Q6QAQ1 | [8-28]      | [A].LVVDNGSGMCKAGFAGDDAPR.[A]      | 1,876470239  | <b>1,500093482</b> |
| P81045 | [1-22]      | [-].PGLAAAIPAPPESQEKPLKPC.[C]      | 1,624786617  | <b>1,522473232</b> |

|         |           |                                  |              |             |
|---------|-----------|----------------------------------|--------------|-------------|
| Q0QF01  | [45-75]   | AKVSDAISTQYPVVDHEFDVAVVGAGGAGL   | 1,717638768  | 1,884676373 |
| P04366  | [18-24]   | [Q].ENFDLSR.[I]                  | 1,810350493  | 1,358185875 |
| P13618  | [1-9]     | [-].NKELDAPVQK.[L]               | 1,524131012  | 1,47243237  |
| P06348  | [68-82]   | [K].ALAAAGYDVEKNNSR.[I]          | 1,439280286  | 1,467243342 |
| O97763  | [20-25]   | [A].EPVHFR.[D]                   | 1,543358988  | 1,38542213  |
| P80928  | [3-12]    | [P].MFVVNTNVPR.[A]               | 1,615357551  | 1,521677122 |
| P17741  | [2-10]    | [M].GKGDPNKPR.[G]                | 1,662370608  | 1,594144723 |
| P83662  | [1-8]     | [-].MKIDIHSH.[I]                 | 1,525994961  | 1,616722132 |
| D0VWV4  | [30-40]   | [P].LGTTAKEEMER.[F]              | 0,052958768  | 0,091218558 |
| P79273  | [25-38]   | [R].LHTIFQSVELPETY.[Q]           | 0            | NaN         |
| P79273  | [25-42]   | [R].LHTIFQSVELPETYQMLR.[Q]       | 0            | NaN         |
| P79273  | [25-42]   | [R].LHTIFQSVELPETYQMLR.[Q]       | 0            | NaN         |
| P79273  | [25-42]   | [R].LHTIFQSVELPETYQMLR.[Q]       | 0            | NaN         |
| Q75NG9  | [87-95]   | [A].LIDSHFEAR.[K]                | 0            | NaN         |
| Q6QAAQ1 | [231-254] | [A].ASSSSLEKSYELPDGQVITIGNER.[F] | 0,557351068  | 0,19269097  |
| P51779  | [27-38]   | [R].ILGGQEAKSHER.[P]             | -0,014566591 | 0,015488953 |
| Q5S3G4  | [32-49]   | [M].ASGGGVPTDEEQATGLER.[E]       | -0,246069202 | 0,614934144 |
| P51779  | [27-40]   | [R].ILGGQEAKSHERPY.[M]           | 1,185698828  | 0,693198842 |
| Q6Q7J2  | [319-328] | [Q].IIIPQNQVNR.[K]               | -0,527571748 | 0,15609141  |
| Q4FAT7  | [23-35]   | [A].LLQGGMLYPQESR.[S]            | 1,045750506  | 0,487498147 |
| P80021  | [135-149] | [T].GAIVDVPVGEELLGR.[V]          | 0,165239843  | 0,290644914 |
| P10173  | [1-7]     | [-].ASQDSFR.[I]                  | -0,343005993 | 1,125310557 |
| Q8WN93  | [23-39]   | [A].ETEEENPDDLIQLTVTR.[N]        | 0            | NaN         |
| Q4KRV1  | [27-39]   | [A].ASQIEDQAEQFFR.[S]            | 1,337281925  | 1,261205516 |
| A5GZW8  | [57-70]   | [Q].ASSKAASLHWTGER.[V]           | -0,104704172 | 0,165506811 |
| P00889  | [26-47]   | [H].ASASSTNLKDILADLIPKEQAR.[I]   | 0,042087445  | 0,038031939 |
| Q8WNV7  | [258-278] | [C].SEDASYITGETVVVGGGTASR.[L]    | 0            | NaN         |
| Q9MY8   | [3-33]    | .GAEELPEMYDYDLIIIGGSGGLAAAKEAAR  | 0            | NaN         |
| Q29308  | [2-16]    | [M].PGVTVKDVNQEFVR.[A]           | -0,14947135  | 0,332989415 |
| Q07717  | [83-100]  | [Y].LLVHTEFTPNAVDQYSCR.[V]       | 0            | NaN         |
| P50828  | [254-271] | [D].LVLTALLSDNHGATYAFR.[G]       | 1,107670577  | 0,484477432 |
| C0HL13  | [345-365] | [R].SCVDFNDCQIWGICDHFCEDR.[I]    | 0            | NaN         |
| Q6QAAQ1 | [8-28]    | [A].LVVDNGSGMCKAGFAGDDAPR.[A]    | 0,057906497  | 0,076236438 |

|         |           |                                   |              |             |
|---------|-----------|-----------------------------------|--------------|-------------|
| Q6QAAQ1 | [8-28]    | [A].LVVDNGSGMCKAGFAGDDAPR.[A]     | 0,153625904  | 0,217565304 |
| P29700  | [286-304] | [S].LVVGPMVVAVPPGIPPVHR.[S]       | 0,91563229   | 0,575106459 |
| Q29318  | [11-20]   | [S].LVVHGPGDLR.[L]                | 1,608525743  | 0,754411814 |
| P02067  | [15-31]   | [G].LWGKVVNDEVGGEALGR.[L]         | -0,523630758 | 1,217532812 |
| P50441  | [218-235] | [T].MADELYDQDYPIYSVEDR.[H]        | 0            | NaN         |
| P53590  | [39-47]   | [W].LNLQEYQSK.[K]                 | 0,013340628  | 0,020101512 |
| P02067  | [32-41]   | [R].LLVVYPWTQR.[F]                | -0,19225679  | 0,252525747 |
| Q7M329  | [185-200] | [G].LEICEDGPVFYPPPKKE.[-]         | 0            | NaN         |
| P02067  | [84-105]  | [K].GTFAKLSELHCDQLHVDPENFR.[L]    | 0            | NaN         |
| P63053  | [57-72]   | [L].SDYNIQKESTLHLVLR.[L]          | -0,275985539 | 0,1804139   |
| Q08094  | [211-227] | [M].GTNKCASQVGMTAPGTR.[R]         | 0,888815373  | 0,527307146 |
| D0VWV4  | [31-40]   | [L].GTTAKEEMER.[F]                | -0,103667976 | 0,236371968 |
| Q9N0F1  | [122-145] | [N].GVIEALLVPDGGKVEGGTPLFTLR.[K]  | 0            | NaN         |
| Q1W0Y2  | [17-25]   | [R].SHYEEGPGK.[N]                 | 1,702573894  | 1,090329627 |
| P33198  | [142-157] | [R].HAHGDQYKATDFVVDR.[A]          | 0,234163067  | 0,129284767 |
| P29700  | [18-25]   | [P].HGPILOGYR.[E]                 | -1,395263314 | 0,899045994 |
| P79263  | [28-46]   | [A].HKNDINIYSLTVDSKVSSR.[F]       | -0,498972431 | 0,444424954 |
| P50828  | [24-39]   | [A].HPLSLTAGPKHGAEGR.[N]          | -2,133763423 | 1,199346001 |
| P41367  | [24-53]   | .HTKAVPQCEPGSGFSFELTEQQKEFQATAR   | 0,041761861  | 0,035042591 |
| Q0MVN8  | [193-201] | [N].GAHEVFNHR.[E]                 | 0            | NaN         |
| F1RKQ4  | [40-48]   | [R].SDLSLKGR.[V]                  | 0,19727414   | 0,427013784 |
| P27917  | [21-41]   | [A].IEAEDTSLDKMQDYVKQATR.[T]      | -0,430011646 | 0,569493173 |
| P80229  | [264-275] | [N].LELLEVNVLPR.[F]               | -0,773129957 | 0,356350541 |
| Q08092  | [209-226] | [M].GTNKGASQAGMTAPGTR.[Q]         | 2,003579909  | 0,971096588 |
| Q71LE2  | [96-117]  | [E].ASEAYLVGLFEDTNLCAIHAKR.[V]    | 0            | NaN         |
| Q29268  | [2-20]    | [M].APSGLKAVVGEKILSGVIR.[S]       | 0,147498642  | 0,087388746 |
| P00503  | [2-26]    | [M].APPSVFAEVPQAQPVLVFKLIADFR.[E] | -0,464565904 | 0,85674383  |
| P80021  | [62-73]   | [G].ADTSVDLEETGR.[V]              | -0,016549936 | 0,027914547 |
| P79382  | [2-9]     | [M].ADLTELMK.[N]                  | -0,293077851 | 0,113233373 |
| P50441  | [52-82]   | ADDKATDPLPKDCPVSSYNEWDPLEEVIVGF   | 0            | NaN         |
| Q6QAAQ1 | [295-312] | [Y].ANTVLSGGTTMYPGIADR.[M]        | 0            | NaN         |
| P01965  | [12-31]   | [K].AAWGKVGGQAGAHGAEALER.[M]      | 0,225737274  | 0,069567992 |
| P01965  | [12-31]   | [K].AAWGKVGGQAGAHGAEALER.[M]      | 0            | NaN         |

|        |             |                                  |              |             |
|--------|-------------|----------------------------------|--------------|-------------|
| P00371 | [84-99]     | [N].AANMGLTPVSGYNLFR.[E]         | 0            | NaN         |
| P06348 | [71-82]     | [A].AAGYDVEKNNSR.[I]             | -0,316229577 | 0,596613154 |
| P50441 | [51-82]     | .ADDKATDPLPKDCPVSSYNEWDPLEEVIVG  | 0,333055536  | 0,353039935 |
| P80147 | [31-54]     | [Q].AAAKVDVEFDYDGPLMKTEVPGPR.[S] | -0,026993918 | 0,025257682 |
| Q8SPS7 | [19-49]     | ^ETGNEATDATDDSCPKPPEIPKGYVEHMMVI | 0            | NaN         |
| Q8SPS7 | [19-49]     | ^ETGNEATDATDDSCPKPPEIPKGYVEHMMVI | -1,949089944 | 0,842753274 |
| Q8SPS7 | [19-49]     | ^ETGNEATDATDDSCPKPPEIPKGYVEHMMVI | 0            | NaN         |
| P14460 | [1-17]      | [-].AEVQDKGEFLAEGGGVR.[-]        | 0,277521491  | 0,098846007 |
| Q8MK48 | [2-15]      | [M].AFNDLLLQVGGVGR.[F]           | -0,195117365 | 0,269631101 |
| P50390 | [23-41]     | [P].AGAGESKCPLMVKVLDAVR.[G]      | 0,848734334  | 0,727277385 |
| P47788 | [8-25]      | [C].AGDALDVAAPCSAVNYLR.[W]       | 0            | NaN         |
| Q04967 | [225-238]   | [T].AGDTHLGGEDFDNR.[L]           | 1,233244999  | 0,870102007 |
| Q6QAQ1 | [19-28]     | [K].AGFAGDDAPR.[A]               | 0,025108458  | 0,027364334 |
| Q06AU5 | [2-24]      | [M].AGGGAGDPGQGAAAAAAAAAPETR.[E] | 0            | NaN         |
| Q2EN81 | [25-40]     | [F].AKLVRPPVQIYGIEGR.[Y]         | 0,290101701  | 0,239436237 |
| Q1W0Y2 | [17-36]     | [R].SHYEEGPGKNLPFSVENKWR.[L]     | 0,14025234   | 0,156563063 |
| Q0QF01 | [45-75]     | ^KVSDAISTQYPVVDHEFDVAVVGAGGAGLF  | 0            | NaN         |
| P14477 | [1-13]      | [-].AIDYDEDEDGRPK.[V]            | -0,993182519 | 0,615062858 |
| P14477 | [1-19]      | [-].AIDYDEDEDGRPKVHVDAR.[-]      | -1,07978946  | 0,610983481 |
| C0HL13 | [3938-3966] | .CISQHLVCDDVDDCGDHFDETCNTGEER    | 0            | NaN         |
| P63221 | [4-15]      | [N].DAGEFVDLYVPR.[K]             | -1,048801403 | 1,032267166 |
| P02067 | [6-31]      | S].AEEKEAVLGLWGKVVNDEVGGEALGR.[L | 0,763056417  | 0,2886696   |
| P12037 | [51-66]     | [L].ARFAQEAEARVELQK.[K]          | -0,253664655 | 1,029870899 |
| Q1W0Y2 | [17-29]     | [R].SHYEEGPGKNLPF.[S]            | -0,159911015 | 0,251558473 |
| Q8SPS7 | [19-41]     | [A].AETGNEATDATDDSCPKPPEIPK.[G]  | -1,594098469 | 1,288334453 |
| Q007T0 | [29-38]     | [G].AQTAATAPR.[I]                | -0,45006098  | 0,168226261 |
| P80021 | [447-463]   | [F].AQFGSDLDAATQQLSR.[G]         | 0,352447994  | 0,120602551 |
| Q28943 | [2-21]      | [M].APVLSKDVADIESILALNPR.[T]     | -0,340441884 | 0,738858437 |
| Q95283 | [30-41]     | [K].SEDYALPVYVDR.[R]             | -0,438531436 | 1,125927577 |
| Q0MVN8 | [188-201]   | [N].IVLQNGAHEVFNHR.[E]           | -1,222350786 | 0,447174499 |
| Q29371 | [43-53]     | [C].APPTAYIDFAR.[Q]              | -0,39276882  | 0,189316359 |
| Q9TV69 | [27-37]     | [R].SEHQVVAVAAR.[D]              | -0,137689206 | 0,222290549 |
| Q95339 | [2-10]      | [M].ASVVPLKDR.[R]                | 0,003668867  | 0,00548501  |

|         |             |                                    |              |             |
|---------|-------------|------------------------------------|--------------|-------------|
| P50441  | [42-62]     | [A].ATASSGNSCAADDKATDPLPK.[D]      | 0            | NaN         |
| A1XQT2  | [2-12]      | [M].ATSSLTKPQMR.[W]                | 0,011056572  | 0,012681101 |
| Q29550  | [15-33]     | [S].ATWAGQPASPPVVDTAQGR.[V]        | 0            | NaN         |
| Q4U116  | [1039-1066] | Y].SEKVPSIKIPMDIMEQQPFLSDSKPSDR.[E | 1,584090573  | 0,89086262  |
| P29700  | [294-304]   | [V].AVPPGIPPVHR.[S]                | 0            | NaN         |
| P01965  | [13-31]     | [A].AWGKVGQGAGAHGAEALER.[M]        | 0,109740973  | 0,045009399 |
| Q19KI0  | [2-8]       | [M].AWNTNLR.[W]                    | 1,40756988   | 1,230675058 |
| P23695  | [25-48]     | [A].AYRPSETLCGGELVDTLQFVCGDR.[G]   | 0            | NaN         |
| C0HL13  | [2757-2773] | [R].CDHYNDCGDNSESGCR.[F]           | 0            | NaN         |
| P08835  | [86-105]    | [N].CDKSIHTLFGDKLCAIPSLR.[E]       | 0            | NaN         |
| C0HL13  | [3951-3966] | [D].CGDHFDETGCGTGEER.[S]           | 0            | NaN         |
| Q6QAAQ1 | [17-28]     | [M].CKAGFAGDDAPR.[A]               | 0            | NaN         |
| Q6QAAQ1 | [17-28]     | [M].CKAGFAGDDAPR.[A]               | 0,12236416   | 0,147030881 |
| C0HL13  | [3645-3675] | IPQSWKCDVDNDCGDYSDEPLQECMGPAY      | 0            | NaN         |
| P81405  | [7-19]      | [D].CIQMVTDLQNAVR.[T]              | 0,414687121  | 0,199922294 |
| Q04967  | [434-449]   | [Y].SDNQPGVLIQVYGER.[A]            | 1,383903056  | 0,784131171 |
| O62839  | [411-424]   | [S].APEQTHSALEHCTR.[Y]             | 0            | NaN         |
| O02705  | [599-613]   | [C].CIVTSTYGWTANMER.[I]            | 0            | NaN         |
| P80021  | [276-301]   | V].SATASDAAPLQYLAPYSGCSMGEYFR.[D   | 0            | NaN         |
| Q8SPS7  | [19-41]     | [A].AETGNEATDATDDSCPKPPEIPK.[G]    | 0            | NaN         |
| Q71LE2  | [101-117]   | [Y].LVGLFEDTNLCAIHAKR.[V]          | 0,964629949  | 0,408106761 |
| P50828  | [28-39]     | [S].LTAGPKHGAEGR.[N]               | -1,19972081  | 0,751419764 |
| Q29092  | [647-660]   | [A].LVASQYGWSGNMER.[I]             | -0,007775045 | 0,012091727 |
| C0HL13  | [3193-3203] | [T].NIEPYLIFS NR.[Y]               | 0,97403881   | 0,571322182 |
| Q95333  | [22-29]     | [G].HPKSLNQR.[E]                   | 0            | NaN         |
| Q1KYT0  | [247-253]   | [V].AASEFYR.[N]                    | -0,071248551 | 0,032138324 |
| P26042  | [481-495]   | [Q].DEQDENGAEASADLR.[A]            | 0            | NaN         |
| Q29048  | [72-81]     | [S].GVSVDGPVLR.[T]                 | 0,99336188   | 0,378699702 |
| P00571  | [116-128]   | [L].LYVDAGPETMTKR.[L]              | 1,118320274  | 0,585980499 |
| P09571  | [455-462]   | [K].SCHTAVDR.[T]                   | 0            | NaN         |
| Q28955  | [2-8]       | [M].PLLVEGR.[R]                    | -0,547004613 | 0,241874577 |
| Q19KI0  | [2-8]       | [M].AWNTNLR.[W]                    | -0,100607813 | 0,093780421 |
| A1XQT2  | [4-12]      | [T].SSLTKPQMR.[W]                  | 1,515770865  | 0,673031273 |

|         |             |                                    |              |             |
|---------|-------------|------------------------------------|--------------|-------------|
| O02705  | [675-688]   | [S].SGFSLEDPQTHANR.[I]             | 0            | NaN         |
| P16225  | [138-143]   | [R].FLLSKR.[G]                     | 1,607282619  | 1,000631483 |
| Q1KYT0  | [373-400]   | R].SGETEDTFIADLVVGLCTGQIKTGAPCR.[S | -0,680436272 | 0,170972823 |
| P50828  | [30-39]     | [T].AGPKHGAEGR.[N]                 | -0,047499102 | 0,026260501 |
| Q6RVA9  | [3-19]      | [S].GGKYVDSEGHLYTVPIR.[E]          | 0,159079353  | 0,10037102  |
| C0HL13  | [4478-4499] | [R].SGEDVNMDIGVSGFGPESAIDR.[S]     | 0            | NaN         |
| P01025  | [958-997]   | ADLSDQVPDTESETKILLQGTPVAQMVEDA     | 0            | NaN         |
| P08835  | [27-34]     | [T].YKSEIAHR.[F]                   | -0,122234205 | 0,035092897 |
| P80021  | [285-301]   | [P].LQYLAPYSGCSMGEYFR.[D]          | 0            | NaN         |
| P80021  | [292-301]   | [Y].SGCSMGEYFR.[D]                 | -0,192950417 | 0,248544746 |
| P62802  | [81-93]     | [K].TVTAMDVVYALKR.[Q]              | -0,781333157 | 0,378008133 |
| P00371  | [93-99]     | [V].SGYNLFR.[E]                    | 0,140064605  | 0,11361275  |
| P29700  | [305-310]   | [R].SHYDLR.[H]                     | -0,361398717 | 0,170513735 |
| Q6SEG5  | [1-19]      | [-].MQLKPMEinPEMLNKVLTR.[L]        | 0            | NaN         |
| Q3ZD69  | [12-25]     | [R].SGAQASSTPLSPTR.[I]             | 0            | NaN         |
| P50441  | [39-55]     | [S].TQAATASSGNSCAADDK.[A]          | 0            | NaN         |
| P01025  | [671-677]   | [S].VQLMEKR.[M]                    | -0,921331336 | 0,512793523 |
| Q71LE2  | [58-64]     | [K].STELLIR.[K]                    | -0,327249855 | 0,816171061 |
| P80021  | [448-463]   | [A].QFGSDLDAATQQLLSR.[G]           | 1,020762942  | 0,382050838 |
| P50441  | [38-62]     | [Q].STQAATASSGNSCAADDKATDPLPK.[D]  | 0            | NaN         |
| Q5S3G4  | [33-49]     | [A].SGGGVPTDEEQATGLER.[E]          | -0,348983729 | 1,17632912  |
| Q6QAAQ1 | [300-312]   | [LM].SGGTTMYPGIADR.[M]             | 0,005567441  | 0,005364073 |
| P80041  | [336-347]   | [H].SHQGSGLITDYR.[H]               | -0,33767869  | 0,614878964 |
| Q9TSX9  | [3-22]      | [P].GGLLLGDEAPNFEANTTIGR.[I]       | 0            | NaN         |
| Q6QAAQ1 | [301-312]   | [S].GGTTMYPGIADR.[M]               | 1,38283866   | 0,72838642  |
| A1E295  | [78-87]     | [D].MILPKSFDAR.[E]                 | 1,26389769   | 0,619042145 |
| P00791  | [16-23]     | [C].LVKVPLVR.[K]                   | 0,562471334  | 0,145348466 |
| P08835  | [310-318]   | [K].SHCIAEAKR.[D]                  | -1,931061736 | 1,285952033 |
| P00636  | [144-158]   | [N].STDEPSEKDALQPGR.[N]            | 1,181412056  | 0,538401368 |
| Q7YS91  | [40-60]     | [L].TSSATSPSSHLPGLSELVER.[G]       | 0            | NaN         |
| P26042  | [144-156]   | [K].SGYLAGDKLLPQR.[V]              | -0,175749813 | 0,286522524 |
| Q29308  | [3-16]      | [P].GVTVKDVNQEFVR.[A]              | 0,88777541   | 0,49668633  |
| Q71LE2  | [107-117]   | [E].DTNLCAIHAKR.[V]                | 0,726974985  | 0,336307348 |



|         |             |                                 |              |             |
|---------|-------------|---------------------------------|--------------|-------------|
| P08059  | [22-27]     | [R].SDLNLR.[R]                  | -0,156587642 | 0,34281206  |
| P80928  | [64-74]     | [H].SIGKIGGAQNR.[S]             | -0,061101141 | 0,068196973 |
| P81140  | [12-20]     | [K].SSRPEFDWR.[D]               | 0,680788001  | 0,341911796 |
| P00795  | [1-8]       | [-].GPIPEVLK.[N]                | 0,18104517   | 0,124910443 |
| Q9GJT2  | [65-86]     | [K].SGYHQAASEHGLVVIAPDTSPR.[G]  | 0            | NaN         |
| P62802  | [57-68]     | [R].GVLKVFLENVIR.[D]            | 1,113161556  | 0,474032225 |
| P01025  | [967-997]   | QQVPDTESETKILLQGTPVAQMVEDAIDGDI | 0            | NaN         |
| Q29550  | [17-33]     | [T].WAGQPASPPVVDTAQGR.[V]       | 0            | NaN         |
| Q07717  | [21-32]     | [A].VARPPKVQVYSR.[H]            | -0,60770659  | 0,273675286 |
| P01965  | [1-7]       | [-].VLSAADK.[A]                 | -0,116435428 | 0,079138049 |
| C0HL13  | [4036-4044] | [R].SMSEHYGER.[C]               | 0            | NaN         |
| Q4FAT7  | [23-35]     | [A].LLQGGMLYPQESR.[S]           | -0,472638006 | 0,2178124   |
| C0HL13  | [3068-3078] | [K].EETTCPPHQFR.[C]             | 1,05929852   | 0,552757079 |
| Q8WNV7  | [21-27]     | [M].ASTGVER.[R]                 | 0,813716566  | 0,432517787 |
| O19069  | [275-295]   | [N].SGPKSKPVVSFIAGLTAPPGR.[R]   | 0,138684837  | 0,071284543 |
| P80021  | [195-204]   | [K].AVDSLPIGR.[G]               | -0,060786208 | 0,038034622 |
| Q04967  | [68-74]     | [N].TVFDAKR.[L]                 | -0,51390031  | 0,147733448 |
| Q04967  | [39-51]     | [R].TTPSYVAFTDTER.[L]           | 0            | NaN         |
| Q8WN98  | [1-20]      | [-].MKDPDPSQVYRPMDPEAAK.[D]     | 0,193278606  | 0,083216654 |
| P09571  | [116-123]   | [RK].SCHTGLGR.[S]               | -0,670831223 | 0,207198503 |
| P11708  | [143-157]   | [K].SAPSIPKENFSCLTR.[L]         | 0,460838958  | 0,315400801 |
| Q6QAAQ1 | [178-183]   | [R].LDLAGR.[D]                  | 0,876339202  | 0,405587454 |
| C0HL13  | [4633-4647] | [Y].SATEDTFKDTANLVR.[E]         | 0,463626941  | 0,240608672 |
|         |             | [C].GLLAQR.[R]                  | 0            | NaN         |
| C0HL13  | [1360-1382] | [N].GGCTHLCIQGPFGAQCECPLGYR.[L] | 0            | NaN         |
| P41367  | [380-392]   | [N].GFNTEYPVEKLMR.[D]           | -1,574207157 | 0,585545137 |
| Q9TSX9  | [4-22]      | [G].GLLLGDEAPNFEANTTIGR.[I]     | 0            | NaN         |
| Q52NJ4  | [2-8]       | [M].GLLSILR.[K]                 | -0,168792302 | 0,560030529 |
| O46427  | [293-317]   | N].GIPYWIVKNSWGPQWGMNGYFLIER.[G | 0            | NaN         |
| P81140  | [363-372]   | [N].GISDEYHVIR.[H]              | -1,351705473 | 0,802617096 |
| Q4U116  | [417-438]   | [N].GDTPHDGGHGGGGHADCEELQR.[T]  | 0            | NaN         |
| Q6QAAQ1 | [53-62]     | [S].YVGDEAQSKR.[G]              | -0,568609172 | 0,233300763 |
| Q6QAAQ1 | [13-28]     | [N].GSGMCKAGFAGDDAPR.[A]        | -1,119002412 | 0,313828406 |

|         |           |                                  |              |             |
|---------|-----------|----------------------------------|--------------|-------------|
| P04366  | [8-24]    | [V].LTLPNDIQVQENFDLSR.[I]        | -1,672005719 | 1,281672581 |
| P53590  | [39-56]   | [W].LNLQEYQSKKLMSDNGVK.[V]       | 1,317312102  | 0,819788203 |
| Q95334  | [603-618] | [N].GNAFLKINPDHIGFYR.[V]         | -0,297622796 | 0,577346489 |
| P80021  | [408-416] | [A].INVGLSVSR.[V]                | -0,074659863 | 0,030827912 |
| Q0MVN8  | [24-43]   | [K].LQSDVAIPKDNQVLIKUH.[A]       | 0            | NaN         |
| P02067  | [4-31]    | ]LSAEEKEAVLGLWGKVVNDEVGGEALGR.   | 0,315963487  | 0,128918764 |
| P02067  | [89-105]  | [K].LSELHCDQLHVDPENFR.[L]        | -0,714123541 | 0,375477874 |
| P50828  | [26-39]   | [P].LSLTAGPKHGAEGR.[N]           | -0,352558265 | 0,312904184 |
| Q29318  | [9-20]    | [N].LSLVVHGPGDLR.[L]             | 0,477063701  | 0,295533262 |
| P80147  | [28-54]   | -].ISQAAAKVDVEFDYDGPLMKTEVPGPR.[ | 0,281065786  | 0,486315214 |
| Q2XVP4  | [286-308] | [Q].LSVAEITNACFEPANQMVKCDPR.[H]  | 0            | NaN         |
| P80021  | [61-73]   | [L].GADTSVDLEETGR.[V]            | 0            | NaN         |
| Q6QAAQ1 | [105-116] | [L].LTEAPLNPKANR.[E]             | 0,979752081  | 0,401263557 |
| P50441  | [49-82]   | .AADDKATDPLPKDCPVSSYNEWDPLEEVIV  | -0,517550215 | 0,190302496 |
| Q8WNNQ7 | [377-386] | [R].LTERPIFYR.[G]                | -0,765031833 | 0,401511087 |
| Q29195  | [79-88]   | [K].SCGKDGFIIR.[V]               | 0,939218998  | 0,437079888 |
| Q8SPS7  | [103-120] | [R].IMGGSLDAKGSFPWQAKM.[I]       | -0,375184755 | 0,178114592 |
| P04366  | [10-24]   | [T].LPNDIQVQENFDLSR.[I]          | 1,059107073  | 0,619203747 |
| P80928  | [82-87]   | [C].GLLAER.[L]                   | -0,591770291 | 1,175738034 |
| P81405  | [1-9]     | [-].GDVCQDCIQ.[M]                | 0            | NaN         |
| Q6QAAQ1 | [273-290] | [C].GIHETTFNSIMKCDVDIR.[K]       | -0,459817442 | 0,502502427 |
| O62839  | [306-320] | [H].SEYPLIPVGKLVNLR.[N]          | 0,109858135  | 0,107174132 |
| Q6QAAQ1 | [273-290] | [C].GIHETTFNSIMKCDVDIR.[K]       | -0,954700155 | 0,490014089 |
| Q4U116  | [336-342] | [K].SYHEIGR.[A]                  | -0,105466454 | 0,190788113 |
| P14460  | [9-17]    | [E].FLAEGGGVR.[-]                | -0,433404783 | 0,140016993 |
| P29797  | [2-13]    | [M].GCLGNSKTEDQR.[N]             | 0,706715333  | 0,272042084 |
| P01965  | [15-31]   | [W].GKVGGOAGAHGAELER.[M]         | 0            | NaN         |
| P05027  | [176-182] | [C].VIIKLNLR.[V]                 | 0,389803936  | 0,288754312 |
| P50390  | [26-41]   | [A].GESKCPLMVKVLDAVR.[G]         | -0,770071208 | 0,777642075 |
| O11780  | [24-38]   | [A].GPAKSPYQLVLQHSR.[L]          | 0            | NaN         |
| Q29550  | [19-33]   | [A].GQPASPPVVDTAQGR.[V]          | -0,769057848 | 0,392123675 |
| P81405  | [1-19]    | [-].GDVCQDCIQMVTDLQNAVR.[T]      | -0,203713166 | 0,359521641 |
| P29700  | [335-356] | [K].GAQSPIPAADGSVPVVRPCPR.[I]    | 0            | NaN         |

|         |           |                                    |              |             |
|---------|-----------|------------------------------------|--------------|-------------|
| P05024  | [208-225] | [HN].GCKVDNSSLTGESEPPQTR.[S]       | -1,023278306 | 0,307402915 |
| P81649  | [91-118]  | ].GQNNCHQSAKPVSLTQCSFTGGNYPNCR.    | 0            | NaN         |
| Q2XVP4  | [54-64]   | [F].SETGAGKHVPR.[A]                | 0,972939241  | 0,573642658 |
| P01965  | [19-31]   | [G].GQAGAHGAEALER.[M]              | -0,15368211  | 0,20687261  |
| P81405  | [1-16]    | [-].GDVCQDCIQMVTDLQN.[A]           | 0            | NaN         |
| P81405  | [1-19]    | [-].GDVCQDCIQMVTDLQNAVR.[T]        | 1,051883368  | 0,591952251 |
| P81405  | [1-19]    | [-].GDVCQDCIQMVTDLQNAVR.[T]        | -0,18785601  | 0,365061479 |
| O46427  | [114-123] | [T].GPYPPSMDWR.[K]                 | -0,082386608 | 0,14418934  |
| Q6QAAQ1 | [20-28]   | [A].GFAGDDAPR.[A]                  | 0,094161535  | 0,052063221 |
| P08835  | [29-34]   | [K].SEIAHR.[F]                     | -1,294072449 | 0,802243959 |
| P80021  | [192-204] | [T].GIKAVDSLVIPIGR.[G]             | -0,035530999 | 0,033882154 |
| Q5S3G4  | [35-49]   | [G].GGVPTDEEQATGLER.[E]            | 1,245392568  | 0,928271235 |
| A1XQU5  | [2-17]    | [M].GKFMKPGKVVLVLAGR.[Y]           | -0,239908955 | 0,521642624 |
| P36968  | [74-89]   | [U].GKTEVNYTQLVDLHAR.[Y]           | 0            | NaN         |
| Q06AU5  | [7-24]    | [A].GDPGQGAIAAAAAAPETR.[E]         | 1,370172222  | 0,686459676 |
| P01965  | [15-31]   | [W].GKVGQAGAHGAEALER.[M]           | -0,038464049 | 0,01393965  |
| Q71LE2  | [103-117] | [V].GLFEDTNLCIAHAKR.[V]            | 0            | NaN         |
| Q5U9S1  | [109-114] | [N].LEGQIR.[I]                     | 0            | NaN         |
| P80229  | [265-275] | [L].ELLENVHLPR.[F]                 | 1,454237059  | 0,756551692 |
| Q71LE2  | [74-84]   | [R].EIAQDFKTDLR.[F]                | 0,086917515  | 0,050120277 |
| P28491  | [18-36]   | [A].EPTIYFKEQFLDGDGWTDLR.[W]       | -0,032737242 | 0,043284872 |
| Q28943  | [4-21]    | [P].VLSKDVADIESILALNPR.[T]         | -0,128641885 | 0,199774378 |
| P79384  | [30-38]   | [C].TQPVSVNER.[I]                  | -0,405147133 | 0,839217283 |
| P02543  | [5-12]    | [R].TVSSSSYR.[R]                   | 1,036259316  | 0,491062982 |
| A5A8V7  | [22-38]   | [G].VFQHGKVEIANDQGNR.[T]           | 1,068022077  | 0,606220232 |
| P05024  | [211-225] | [K].VDNSSLTGESEPPQTR.[S]           | 0            | NaN         |
| P00346  | [27-52]   | [K].VAVLGASGGIGQPLSLLLKNSPLVSR.[L] | -1,071959782 | 0,539063801 |
| P08835  | [26-34]   | [D].TYKSEIAHR.[F]                  | -0,60776943  | 0,440535657 |
| P01965  | [41-50]   | [K].TYFPFNLSH.[G]                  | 0            | NaN         |
| Q6QAAQ1 | [297-312] | [N].TVLSGGTTMYPGIADR.[M]           | 0            | NaN         |
| Q6Q2J0  | [269-291] | [Y].VISAIPTLTAKIHFRPELPSE.[N]      | 0            | NaN         |
| Q6QAAQ1 | [297-312] | [N].TVLSGGTTMYPGIADR.[M]           | -1,061498712 | 0,332479352 |
| Q29554  | [111-125] | [C].TTSQEVTTQISQEAQR.[T]           | 0            | NaN         |

|         |             |                                    |              |             |
|---------|-------------|------------------------------------|--------------|-------------|
| A1XQU1  | [44-62]     | [G].TTIAGVVYKDGIVLGADTR.[A]        | 0,005016889  | 0,010413099 |
| P62936  | [2-19]      | [M].VNPTVFFDIAVDGEPLGR.[V]         | -0,039512375 | 0,07051896  |
| Q6QAAQ1 | [148-173]   | [R].TTGIVMDSGDGVTHTVPIYEGYALPH.[A] | 0            | NaN         |
| P00348  | [148-162]   | [N].TSSLQITSLANATTR.[Q]            | -1,457982769 | 0,709425834 |
| P01965  | [17-31]     | [K].VGGQAGAHGAEALER.[M]            | 0,982093333  | 0,501785042 |
| A1XQR6  | [5-18]      | [A].VGPGYQSQPSCFDR.[V]             | 1,429697827  | 0,66344165  |
| P00355  | [4-11]      | [K].VGVNGFGR.[I]                   | -0,276675324 | 0,578607755 |
| Q9N1F5  | [8-25]      | [R].SLGKGSAPPGVPVEGLIR.[V]         | -0,180954568 | 0,097542643 |
| O02772  | [23-31]     | [K].SIGVGFATR.[Q]                  | -0,037682836 | 0,074262347 |
| P02067  | [2-31]      | .VHLSAEEKEAVLGLWGKVVNDEVGGEALGI    | 0,070948462  | 0,02754479  |
| Q07717  | [85-100]    | [L].VHTEFTPNAVDQYSCR.[V]           | 0            | NaN         |
| Q06AT9  | [2-11]      | [M].VKLFIGNLPR.[E]                 | -0,254844934 | 0,592353008 |
| COHL13  | [2398-2430] | .LHFDPEDYNVPFTAISVEETAVAVDYDSIDN   | 0            | NaN         |
| P82460  | [2-21]      | [M].VKQIESKYAFQEALNSAGEK.[L]       | 0,083995541  | 0,039213767 |
| P00355  | [2-11]      | [M].VKVGVNGFGR.[I]                 | 0            | NaN         |
| P00355  | [2-11]      | [M].VKVGVNGFGR.[I]                 | 0,210816347  | 0,453183166 |
| P02543  | [54-64]     | [Y].TSSPGGVYATR.[S]                | -0,169763804 | 0,239449237 |
| P00355  | [2-11]      | [M].VKVGVNGFGR.[I]                 | 0,136790529  | 0,236890594 |
| Q3ZD69  | [51-60]     | [R].SLETENAGLR.[L]                 | -0,414269466 | 0,21015826  |
| Q4U116  | [407-438]   | GGENVQMNGDTPHDGGHGGGGHADCEEI       | 0            | NaN         |
| P02543  | [87-100]    | [F].SLADAINTEFKNTR.[T]             | -1,765802957 | 0,582186908 |
| P29700  | [287-304]   | [L].VVGPMVVAVPPGIPPVHR.[S]         | 0,360148941  | 0,233891748 |
| P20305  | [43-62]     | [M].VVEHPEFLKAGKEPGLQIWR.[V]       | 0,086838146  | 0,05802544  |
| Q6QAAQ1 | [9-28]      | [L].VVDNGSGMCKAGFAGDDAPR.[A]       | 0,834113285  | 1,096683691 |
| P29700  | [292-304]   | [M].VVAVPPGIPPVHR.[S]              | 0,184396657  | 0,296655955 |
| P02067  | [134-147]   | [K].VVAGVANALAHKYH.[-]             | 0            | NaN         |
| Q0QF01  | [47-75]     | .VSDAISTQYPVVDHEFDAVVVGAGGAGLR.    | 0            | NaN         |
| P00377  | [1-28]      | .VRPLNCIVAVSQNMGIGKNGDLPWPPLR.[    | 1,155889331  | 0,610620363 |
| P04366  | [7-24]      | [P].VLTLPNDIQVQENFDLSR.[I]         | 0,702342272  | 0,374722511 |
| Q4U116  | [413-438]   | .VQMNGDTPHDGGHGGGGHADCEELQR.       | 0            | NaN         |
| Q4U116  | [413-438]   | .VQMNGDTPHDGGHGGGGHADCEELQR.       | 0            | NaN         |
| P04366  | [16-24]     | [Q].VQENFDLSR.[I]                  | -0,689684982 | 0,422575796 |
| Q9MYT8  | [2-15]      | [M].VPPVQVSPLIKLGR.[Y]             | -0,112690405 | 0,308759744 |

|        |             |                                     |              |             |
|--------|-------------|-------------------------------------|--------------|-------------|
| P80031 | [3-11]      | [P].YTITYFPVR.[G]                   | -0,554694706 | 0,277657243 |
| P29700 | [16-25]     | [A].VPHGPILGYR.[E]                  | -0,315160145 | 1,219636677 |
| Q29318 | [12-20]     | [L].VVHGPGLR.[L]                    | 0            | NaN         |
| B1PK17 | [169-188]   | [R].SIKYPVGIEVGPQPGVLR.[A]          | 0,979884863  | 0,508056989 |
| P02554 | [101-121]   | [N].WAKGHYTEGAELVDSVLDVVR.[K]       | 0,884699943  | 0,58275179  |
| P67937 | [6-12]      | [N].SLEAVKR.[K]                     | 0,068239504  | 0,080774514 |
| P01965 | [14-31]     | [A].WGKVGQAGAHGAEALER.[M]           | 0,116246124  | 0,053530772 |
| P18648 | [22-33]     | [F].WQQDDPQSPWDR.[V]                | -0,667886954 | 1,116638532 |
| C0HL13 | [85-102]    | [Y].WVCDGEEDCSNGADEHQ.R.[C]         | 0            | NaN         |
| P06348 | [74-82]     | [G].YDVEKNNSR.[I]                   | -0,011480117 | 0,016775217 |
| Q6QAQ1 | [240-254]   | [S].YELPDGQVITIGNER.[F]             | 1,116697709  | 0,440065429 |
| C0HL13 | [4551-4584] | SPVNPDELAPDTKPASPSADETQVTKWNIF      | 0            | NaN         |
| Q29545 | [261-273]   | [C].YLAQVPSHAVVAR.[S]               | 1,230435185  | 0,643253796 |
| Q1W0Y2 | [17-34]     | [R].SHYEEGPGKNLPFSVENK.[W]          | 1,197406178  | 0,595056151 |
| Q71LE2 | [42-50]     | [R].YRPGTVLR.[E]                    | -0,069758199 | 0,088547255 |
| A1E295 | [129-141]   | [R].VNVEVSAEDMLTC.[C]               | 0            | NaN         |
| Q28970 | [2-15]      | [M].VILQQGDYVWMDLR.[S]              | 0            | NaN         |
| C0HL13 | [2398-2430] | LHFDPEYDYNVPTAISVEETAVAVDYDSIDN     | 0            | NaN         |
| P01965 | [1-11]      | [.].VLSAADKANVK.[A]                 | -1,163160499 | 0,404023063 |
| O62839 | [434-444]   | [N].SANEDNVTQVR.[T]                 | 0            | NaN         |
| A1XQR6 | [2-18]      | [M].PVAVGPGYQSQPSCFDR.[V]           | -0,350170001 | 0,635944036 |
| P80031 | [1-11]      | [.].PPYTITYFPVR.[G]                 | 0,19274724   | 0,241069812 |
| P00889 | [27-47]     | [A].SASSTNLKDILADLIPKEQAR.[I]       | 0,458651682  | 0,593708109 |
| P80928 | [1-12]      | [.].MPMFVVNTNVR.[A]                 | -0,03191246  | 0,042399136 |
| Q9MYT8 | [1-15]      | [.].MVPPVQVSPLIKLGR.[Y]             | -0,254668001 | 0,394290825 |
| P02067 | [1-31]      | 1VHLSAEEKEAVLGLWGKVNVDVGGGALG       | 0            | NaN         |
| Q6QAQ1 | [44-62]     | [V].MVGMGQKDSYVGDEAQSKR.[G]         | 1,373175828  | 0,63368242  |
| Q2XVP4 | [203-214]   | [F].MVDNEAIYDICR.[R]                | -0,046888631 | 0,026432089 |
| P63053 | [1-27]      | [G].MQIFVKTLTGKTITLEVEPSDTIENVK.[A] | 0            | NaN         |
| P80229 | [346-362]   | [L].MPEEDFIADHPFIFFIR.[H]           | 0            | NaN         |
| Q9MYT8 | [3-15]      | [V].PPVQVSPLIKLGR.[Y]               | 0,230132569  | 0,49854279  |
| Q4U116 | [415-438]   | Q].MNGDTPHDGGHGGGGHADCEELQR.[T]     | 0            | NaN         |
| P01965 | [81-92]     | [L].SALSDLHAHKLR.[V]                | 0            | NaN         |

|        |           |                                   |              |             |
|--------|-----------|-----------------------------------|--------------|-------------|
| Q29036 | [2-11]    | [M].SASVLSVISR.[F]                | -0,042673224 | 0,083797502 |
| Q8WN98 | [1-22]    | [-].MKDPDPSQVYRPDMDPEAAKDK.[G]    | 0,224130511  | 0,123477731 |
| O62839 | [410-424] | [F].SAPEQTHSALEHCTR.[Y]           | 0            | NaN         |
| Q04967 | [43-51]   | [S].YVAFDTER.[L]                  | 0            | NaN         |
| P50441 | [70-82]   | [Y].NEWDPLEEVIVGR.[A]             | 0,820659156  | 0,329362036 |
| Q9MZ16 | [124-139] | [V].NLGCDVDFDIAGPSIR.[G]          | 1,555322612  | 0,854892425 |
| P62802 | [26-36]   | [D].NIQGITKPAIR.[R]               | 0,005712592  | 0,009656979 |
| P00371 | [86-99]   | [A].NMGLTPVSGYNLFR.[E]            | 1,529831876  | 1,121831913 |
| P02067 | [109-117] | [G].NVIVVVLAR.[R]                 | -0,071189473 | 0,024621562 |
| P02554 | [100-121] | [N].NWAKGHYTEGAELVDSVLDVVR.[K]    | 0            | NaN         |
| Q29594 | [2-13]    | [M].PFSNSHNTLKLRL.[F]             | -0,383848576 | 0,355734855 |
| P80928 | [2-12]    | [M].PMFVVNTNVPR.[A]               | -0,061773945 | 0,10633391  |
| Q9TSX9 | [2-22]    | [M].PGGLLLGDEAPNFEANTTIGR.[I]     | 0,203302078  | 0,419582115 |
| P81045 | [1-16]    | [-].PGLAAAIAPPESQEK.[K]           | 1,014042935  | 0,616648609 |
| P47788 | [1-25]    | [-].MKPPAACAGDALDVAAPCSAVNYLR.[W] | 0            | NaN         |
| P15145 | [827-840] | [R].SALACSNEVWLLNR.[Y]            | 0            | NaN         |
| Q0QF01 | [44-75]   | AKVSDAISTQYPVVDHEFDVAVVGAGGAGL    | -0,058278843 | 0,093527356 |
| Q2XQV4 | [22-55]   | .APTQAVPAPNQQPEIFYNQIFINNEWHDAI   | 0            | NaN         |
| P01965 | [1-11]    | [-].VLSAADKANVK.[A]               | -1,408785701 | 0,908136817 |
| O02713 | [52-61]   | [R].SPGVAELSQR.[C]                | -0,062488802 | 0,104640032 |
| Q9GMB0 | [26-39]   | [A].SPEALPLVNEDVKR.[T]            | 0,135309344  | 0,250803062 |
| P08835 | [89-105]  | [K].SIHTLFGDKLCAIPSLR.[E]         | -1,104969919 | 0,497075251 |
| O62839 | [395-424] | QDNQGGAPNYYPNFSFAPEQTHSALEHCTR    | 0            | NaN         |
| P41367 | [23-53]   | 2HTKAVPQCEPGSGFSFELTEQQKEFQATAF   | 1,339412258  | 1,169626439 |
| P41367 | [23-53]   | 2HTKAVPQCEPGSGFSFELTEQQKEFQATAF   | -0,310711342 | 0,363787874 |
| P41367 | [23-46]   | [S].QHTKAVPQCEPGSGFSFELTEQQK.[E]  | 0            | NaN         |
| P41367 | [23-46]   | [S].QHTKAVPQCEPGSGFSFELTEQQK.[E]  | 0            | NaN         |
| Q95334 | [65-79]   | [D].QGVCPASEDESGNWR.[D]           | 0            | NaN         |
| O62839 | [395-424] | QDNQGGAPNYYPNFSFAPEQTHSALEHCTR    | 0            | NaN         |
| Q29201 | [2-15]    | [M].PSKGPLQSVQVFR.[K]             | -0,036886033 | 0,040829925 |
| O62839 | [395-424] | QDNQGGAPNYYPNFSFAPEQTHSALEHCTR    | 0            | NaN         |
| A5PF10 | [386-398] | [D].QAPQLYVLYEKGR.[N]             | 1,240827528  | 0,96909493  |
| P50441 | [40-62]   | [T].QAATASSGNSCAADDKATDPLPK.[D]   | 0            | NaN         |

|         |             |                                   |              |             |
|---------|-------------|-----------------------------------|--------------|-------------|
| P50441  | [40-62]     | [T].QAATASSGNSCAADDKATDPLPK.[D]   | -0,691121813 | 0,983758844 |
| P50441  | [40-55]     | [T].QAATASSGNSCAADDK.[A]          | 0            | NaN         |
| P50441  | [40-55]     | [T].QAATASSGNSCAADDK.[A]          | 0            | NaN         |
| P05027  | [84-107]    | [S].QKTEISFRPNDPQSYESYVVVSIVR.[F] | 0            | NaN         |
| P80021  | [44-58]     | [L].QKTGTAEVSSILEER.[I]           | 0,05082404   | 0,073149463 |
| Q29095  | [29-40]     | [L].QPNFQEDKFLGR.[W]              | 1,435292857  | 0,717265195 |
| Q5S1U1  | [177-190]   | [T].QSAEITIPVTFEAR.[A]            | -0,201459168 | 0,50797491  |
| Q08094  | [257-266]   | [N].QSGQVFLGR.[Q]                 | -0,559481141 | 0,746991359 |
| Q29221  | [240-259]   | [Y].QTAISENYQTMSDTTFKALR.[R]      | 0            | NaN         |
| Q2XVP4  | [176-214]   | AVVEPYNSILTTHTTLEHSDCAFMVDNEAIY   | 0            | NaN         |
| P01846  | [87-105]    | [C].QVTHEGTIVEKTVTPSECA.[-]       | 0            | NaN         |
| P80021  | [186-204]   | [V].REPMQTGIKAVDLSVPIGR.[G]       | -1,100989283 | 0,426549998 |
| P03974  | [625-638]   | [N].RPDIIDPAILRPGR.[L]            | 0            | NaN         |
| Q9GMB0  | [26-38]     | [A].SPEALPLVNEDVK.[R]             | -0,521784108 | 0,231799629 |
| P16276  | [637-648]   | [V].TQEFGPVPDTAR.[Y]              | 0,011502412  | 0,005258725 |
| Q6QAAQ1 | [269-290]   | [G].MESCGIHETTFNSIMKCDVDIR.[K]    | 0            | NaN         |
| P00346  | [213-229]   | [C].TPKVDFPQDQLSTLTGR.[I]         | 0,997987151  | 0,563357832 |
| Q52NJ6  | [97-110]    | [R].STYNHLSSWLTAR.[N]             | -0,566252735 | 0,19765022  |
| P04366  | [13-24]     | [N].DIQVQENFDLSR.[I]              | 1,67289295   | 1,184869114 |
| C0HL13  | [4485-4499] | [M].DIGVSGFGPESAIDR.[S]           | 1,617111281  | 1,02431457  |
| A1XQS5  | [62-68]     | [R].DIDTAAK.[F]                   | -0,305517445 | 1,170006369 |
| Q29092  | [22-37]     | [A].EDEVDVDGTVEEDLGK.[S]          | -0,186430333 | 0,410618749 |
| Q6QAAQ1 | [4-28]      | D].DIAALVVDNGSGMCKAGFAGDDAPR.[A   | 0,994956428  | 0,541007196 |
| P26044  | [490-509]   | [H].DENNAEASAELSNDGVMNHR.[S]      | 0            | NaN         |
| P50828  | [27-39]     | [L].SLTAGPKHGAAGR.[N]             | -1,721249211 | 1,107670577 |
| Q9TSX9  | [9-22]      | [G].DEAPNFEANTTIGR.[I]            | -0,190515856 | 0,440497233 |
| P24854  | [23-38]     | [G].DEAIHCPCSEEKLAR.[C]           | 0,079109392  | 0,125476784 |
| Q9N0F1  | [69-89]     | [K].DDVITVKTPAFAESVTEGDVR.[W]     | -1,259000372 | 0,535005925 |
| P50441  | [224-235]   | [Y].DQDYPIYSVEDR.[H]              | 0            | NaN         |
| P48819  | [20-27]     | [A].DQESCKGR.[C]                  | 0,315963668  | 0,128904251 |
| P22412  | [17-25]     | [A].DQFRDLAVR.[I]                 | 0,063083162  | 0,080300194 |
| P02543  | [51-64]     | [R].SLYTSSPGGVYATR.[S]            | -1,077352546 | 0,449976705 |
| P02067  | [95-105]    | [C].DQLHVDPENFR.[L]               | -0,040219394 | 0,035862275 |

|         |             |                                  |              |             |
|---------|-------------|----------------------------------|--------------|-------------|
| P80021  | [197-204]   | [V].DSLVPIGR.[G]                 | -1,589543605 | 1,289371112 |
| Q9TV61  | [1202-1216] | [A].DSVAELGEQIDNLQR.[V]          | 0            | NaN         |
| Q8HZK3  | [1332-1339] | [E].DTLSLHIR.[A]                 | 0            | NaN         |
| P08835  | [25-34]     | [R].DTYKSEIAHR.[F]               | 0            | NaN         |
| P08835  | [25-34]     | [R].DTYKSEIAHR.[F]               | 0,059071958  | 0,026266884 |
| P81405  | [2-19]      | [G].DVCQDCIQMVTDLQNAVR.[T]       | 0            | NaN         |
| P81405  | [2-19]      | [G].DVCQDCIQMVTDLQNAVR.[T]       | -0,686229015 | 0,331857044 |
| Q9MZ16  | [128-139]   | [C].DVDFDIAGPSIR.[G]             | -0,446536662 | 0,208817661 |
| P50828  | [132-152]   | [R].SLQEEFPGVPSPLDAAVECHR.[G]    | 0            | NaN         |
| P02543  | [430-440]   | [E].SLPLVDTHSKR.[T]              | -1,037964302 | 0,573635588 |
| I3LMB3  | [21-37]     | [A].EAPQEHDPTFYDYQSLR.[I]        | -0,254914338 | 0,317405096 |
| P80021  | [335-345]   | [R].EAYPGDVFYH.[S]               | 0            | NaN         |
| Q5S3G4  | [31-49]     | [S].MASGGGVPTDEEQATGLER.[E]      | -0,55146906  | 0,225964935 |
| P06867  | [20-38]     | [G].DSLDDYVNTQGAFSLSR.[K]        | 0            | NaN         |
| P16276  | [634-648]   | [R].NAVQTQEFPGVPDTAR.[Y]         | 0            | NaN         |
| C0HL13  | [4036-4044] | [R].SMSEHYGER.[C]                | -0,192762932 | 0,394633851 |
| B3SP85  | [54-72]     | [S].DPPPVNVNLYYESLCNGCR.[Y]      | -1,085771592 | 0,4315181   |
| P48819  | [412-427]   | [C].EPIQSVYFFSGEEYYR.[V]         | 0,011928104  | 0,015287191 |
| P02554  | [3-14]      | [R].EIVHIQAGQCGN.[Q]             | 0            | NaN         |
| Q6QAAQ1 | [241-254]   | [Y].ELPDGQVITIGNER.[F]           | -0,274305393 | 0,212428812 |
| P02067  | [91-105]    | [S].ELHCDQLHVDPENFR.[L]          | 0,274518018  | 0,170483384 |
| P29700  | [17-25]     | [V].PHGPILGYR.[E]                | 0,418075045  | 0,253246559 |
| C0HL13  | [2335-2362] | ].SPAENVNPNCLQNNGGCTHFCFALPQLR.[ | 0            | NaN         |
| P37111  | [9-17]      | [G].EHPSVTLFR.[Q]                | -0,707010563 | 0,292174168 |
| P00348  | [146-162]   | [A].SNTSSLQITSLANATTR.[Q]        | 0,150686151  | 0,070326141 |
| A5GFQ5  | [46-52]     | [A].EETDWVR.[L]                  | -0,142429684 | 0,334473752 |
| P79263  | [807-829]   | [K].ETLYSVMPLKITMDKAGLLLLS.[S]   | 0            | NaN         |
| Q29092  | [24-39]     | [D].EVDVDGTVEEDLGKSR.[E]         | 0,030133657  | 0,016733944 |
| Q29122  | [506-522]   | [N].EVHYVDNQDCIDLIEAR.[L]        | 0,826821341  | 0,409276486 |
| Q29183  | [23-39]     | [G].EYVGLSANQCAVPAKDR.[V]        | 1,018772289  | 0,684784866 |
| P01025  | [23-35]     | [G].DPIYTIITPNVLR.[L]            | -1,19641002  | 0,75965024  |
| Q6QAAQ1 | [21-28]     | [G].FAGDDAPR.[A]                 | -0,203304738 | 0,295676172 |
| P29804  | [29-38]     | [T].FANDATFEIK.[K]               | -0,177913761 | 0,039134964 |



|        |             |                                    |              |             |
|--------|-------------|------------------------------------|--------------|-------------|
| P29804 | [29-44]     | [T].FANDATFEIKKCDLHR.[L]           | -0,183353453 | 0,184586279 |
| P62936 | [8-19]      | [F].FDIAVDGEPLGR.[V]               | 1,186171348  | 0,454422513 |
| C0HL13 | [4592-4605] | [N].FENPIYAETENEPK.[V]             | 0            | NaN         |
| Q0QF01 | [33-42]     | [S].FHFTVDGNKR.[S]                 | -0,614438246 | 1,212247102 |
| Q3ZD69 | [282-296]   | [N].SNLVGAAHEELQQSR.[I]            | 0            | NaN         |
| Q711S8 | [24-35]     | [G].FPVYDYDPSSLR.[E]               | -0,456374103 | 1,071541557 |
| Q9XT00 | [70-81]     | [A].FQADVSEATAR.[R]                | 0            | NaN         |
| Q29095 | [32-40]     | [N].FQEDKFLGR.[W]                  | -0,632987053 | 0,825160537 |
| Q6ITQ4 | [92-108]    | [R].SNEHENAYENTSEEEGR.[V]          | 0            | NaN         |
| P01025 | [958-977]   | [R].EEIPPADLSDQVPDTESETK.[I]       | 0            | NaN         |
| Q29092 | [22-39]     | [A].EDEVDVDGTVEEDLGKSR.[E]         | 0,015930636  | 0,017356147 |
| A1XQS5 | [62-99]     | [AAKFIGAGAATVGVAGSGAGIGTVFGSLIIG   | 0            | NaN         |
| Q2EN81 | [24-40]     | [P].FAKLVRPPVQIYGIEGR.[Y]          | 0,0070301    | 0,011616397 |
| Q007T0 | [31-38]     | [Q].TAAATAPR.[I]                   | -0,582679983 | 1,14398374  |
| Q95312 | [41-56]     | [F].TFASPTQVFFNGANVR.[Q]           | -0,095570243 | 0,120561597 |
| Q70BM6 | [2-9]       | [M].TFAELVDR.[V]                   | 0,000767345  | 0,001102019 |
| P00258 | [59-72]     | [W].SSSEDKITVHFINR.[D]             | -0,305118173 | 0,113428913 |
| Q2XVP4 | [187-214]   | [N].SILTHTTLEHSDCAFMVDNEAIYDICR.[R | 0            | NaN         |
| Q2XVP4 | [187-214]   | [N].SILTHTTLEHSDCAFMVDNEAIYDICR.[R | 0            | NaN         |
| Q3ZD69 | [428-435]   | [R].SSFSQHAR.[T]                   | 0            | NaN         |
| Q0QF01 | [43-75]     | [AKVSDAISTQYPVVDHEFDAVVVGAGGAGI    | 0,058785323  | 0,071976154 |
| F1RKQ4 | [9-35]      | [J].SVAGCADDALAGLVACNPSLQLLQGHR.[  | 0            | NaN         |
| P15145 | [573-599]   | [R].SSAFDYLWIVPISSIKNGVMQDHYWLR.[C | 0            | NaN         |
| P50441 | [270-282]   | [R].SQVTNYMGIEWMR.[K]              | 0,283187141  | 0,205640978 |
| P16276 | [412-424]   | [K].SQFTITPGSEQIR.[A]              | -0,426057819 | 0,697131843 |
| P10173 | [2-7]       | [A].SQDSFR.[I]                     | -0,282144733 | 0,905536054 |
| P80147 | [29-54]     | [I].SQAAAKVDVEFDYDGPLMKTEVPGPR.[S  | -0,773177618 | 0,281511166 |
| P04366 | [5-24]      | [A].SPVLTLPNDIQVQENFDLSR.[I]       | -0,739249562 | 0,3789151   |
| P01846 | [80-105]    | [K].SSSGFTCQVTHEGTIVEKVTTPSECA.[-] | 0            | NaN         |
| Q29307 | [26-34]     | [F].SSDTPEGVR.[S]                  | -0,906062248 | 0,463963485 |
| P80147 | [230-250]   | [H].SKAIHKIDIPSFWDWPIAPFPR.[L]     | 0            | NaN         |
| C0HL13 | [641-655]   | [R].SSTRPFGVTVYHAIR.[Q]            | -0,256691525 | 0,102396954 |
| P24964 | [64-71]     | [F].SSVTHICR.[D]                   | 1,099776966  | 0,552222322 |

|         |             |                                    |              |             |
|---------|-------------|------------------------------------|--------------|-------------|
| P00506  | [30-52]     | [A].SSWWAHVEMGPPDPILGVTEAFK.[R]    | 0            | NaN         |
| P00506  | [30-53]     | [A].SSWWAHVEMGPPDPILGVTEAFKR.[D]   | 0            | NaN         |
| P00506  | [30-53]     | [A].SSWWAHVEMGPPDPILGVTEAFKR.[D]   | -0,269904373 | 0,586265764 |
| Q02038  | [38-45]     | [M].SSYTV DGR.[N]                  | -0,017897501 | 0,028668421 |
| Q8SQ26  | [7-22]      | [S].STADGVAVVGSGLIGR.[S]           | 0,966789368  | 0,447685442 |
| P50441  | [38-55]     | [Q].STQAATASSGNSCAADDK.[A]         | 0            | NaN         |
| P50441  | [38-55]     | [Q].STQAATASSGNSCAADDK.[A]         | 0            | NaN         |
| P50441  | [38-62]     | [Q].STQAATASSGNSCAADDKATDPLPK.[D]  | -0,087177108 | 0,056546063 |
| P50441  | [38-62]     | [Q].STQAATASSGNSCAADDKATDPLPK.[D]  | 0,875029271  | 0,556334826 |
| Q767M3  | [29-41]     | [L].STQSEPHGSPISR.[R]              | 0            | NaN         |
| O19069  | [279-295]   | [K].SKPVVSFIAGLTAPPGR.[R]          | 0            | NaN         |
| Q6QAAQ1 | [232-254]   | [A].SSSSLEKSYELPDGQVITIGNER.[F]    | 0,17364755   | 0,109033456 |
| P09571  | [259-280]   | [R].SVDGQEDSIWELLNQAQEHFGR.[D]     | 0            | NaN         |
| Q29318  | [40-55]     | [H].SVGICGSDVHYWQHGR.[I]           | 0            | NaN         |
| P33198  | [301-322]   | [T].SVLVCPDGKTIEAAHGTVTR.[H]       | 0            | NaN         |
| Q6QAAQ1 | [106-116]   | [L].TEAPLNPKANR.[E]                | 0,013349237  | 0,014686636 |
| COHL13  | [680-688]   | [R].TDNGGLGYR.[C]                  | -0,284388104 | 0,833212309 |
| P08835  | [76-105]    | ].TCVADESAENCDKSIHTLFGDKLCAIPSLR.[ | 0            | NaN         |
| P50828  | [29-39]     | [L].TAGPKHGAEGR.[N]                | -1,50848949  | 0,958448525 |
| Q6QAAQ1 | [52-62]     | [D].SYVGDEAQSKR.[G]                | -0,358727573 | 0,485250693 |
| Q0QF01  | [196-207]   | [R].TGHSLHTLYGR.[S]                | 0            | NaN         |
| Q6QAAQ1 | [239-254]   | [K].SYELPDGQVITIGNER.[F]           | -0,217345828 | 0,63243242  |
| Q8MIR4  | [394-422]   | ].SYAPGGPAYQPVVEAFGTDILHKDGTINR.]. | 0            | NaN         |
| P00506  | [31-53]     | [S].SWWAHVEMGPPDPILGVTEAFKR.[D]    | 0            | NaN         |
| P01025  | [670-677]   | [R].SVQLMEKR.[M]                   | -0,765768111 | 0,387978439 |
| P79263  | [695-707]   | [L].SVPDETSHDMSR.[I]               | 0            | NaN         |
| O62839  | [445-456]   | [R].TFYLNVLNEEER.[K]               | 0            | NaN         |
| P62895  | [29-39]     | [K].TGPNLHGLFGR.[K]                | 0,07840553   | 0,075647931 |
| P00371  | [87-99]     | [N].MGLTPVSGYNLFR.[E]              | -1,199353397 | 0,395463479 |
| P79273  | [27-42]     | [H].TIFQSVELPETYQMLR.[Q]           | 0            | NaN         |
| COHL13  | [3192-3203] | [N].TNIOPYLIFS NR.[Y]              | 0,325613041  | 0,179331927 |
| COHL13  | [4590-4605] | [N].TNFENPIYAETENEPK.[V]           | 0            | NaN         |
| P02543  | [101-113]   | [R].TNEKVELQELNDR.[F]              | 0,970956681  | 0,387059977 |

|        |           |                                  |              |             |
|--------|-----------|----------------------------------|--------------|-------------|
| Q29099 | [109-122] | [N].TMVNYTSTVTPVLR.[G]           | 0            | NaN         |
| P80031 | [4-11]    | [Y].TITYFPVR.[G]                 | -1,244892009 | 1,185152321 |
| P04366 | [9-24]    | [L].TLPNDIQVENFDLSR.[I]          | -1,067929675 | 1,025123698 |
| P08835 | [92-105]  | [H].TLFGDKLCAIPSLR.[E]           | -0,732860334 | 0,295183084 |
| P80021 | [46-58]   | [K].TGTAEVSSILEER.[I]            | -0,099955332 | 0,154288421 |
| P33198 | [310-322] | [K].TIEAEEAHGTVTR.[H]            | 0            | NaN         |
| Q2EN81 | [77-85]   | [A].SIMNPYVKR.[S]                | 0,621015532  | 0,208467478 |
| Q29261 | [2-23]    | [M].TKLNAQVKGSLNVTTPGVQIWR.[I]   | 0,154024065  | 0,173453721 |
| P08835 | [435-451] | [Y].TKKVPQVSTPTLVEVAR.[K]        | -0,966084965 | 0,432809493 |
| P28839 | [1-9]     | [-].TKGLVLGIY.[S]                | -0,334148226 | 0,14451993  |
| P41367 | [25-53]   | ].TKAVPQCEPGSGFSFELTEQQKEFQATAR. | 0,95144687   | 0,563814829 |
| Q29261 | [757-788] | TNLSSGPLPIFPLEQLVNKPAEELPQGVDPSF | 0            | NaN         |
| P26044 | [487-509] | [H].DEHDENNAEASAELSNDGVMNHR.[S]  | 0            | NaN         |

The difference indicates doxycycline vs. control group. Proteins were considered significant if  $-\log_{10}(\text{p-value}) > 1.3$ . Significant p-values are marked bold.

Abbreviations: N/A = not available
